# Supplementary material
Source: publisher figshare collection journal article supplement (https://sage.figshare.com/ndownloader/files/14729096)
Supplement: Supplementary file 1 [file 14729096]

**Supplementary Table 1. Summary of output statistics of transcriptome sequencing**

| Sample | Raw Reads | Clean reads | Clean bases | Q20(%) | GC(%) |
|--------|-----------|-------------|-------------|--------|-------|
| F6h    | 52486552  | 50568290    | 7.59G       | 97.20  | 51.17 |
| M6h    | 66248620  | 63809956    | 9.57G       | 97.10  | 50.91 |
| F12h   | 57236690  | 54783724    | 8.22G       | 96.87  | 51.67 |
| M12h   | 60949966  | 58627158    | 8.79G       | 97.14  | 51.29 |
| F24h   | 54166678  | 52846538    | 7.93G       | 96.86  | 51.08 |
| M24h   | 54053506  | 52694604    | 7.9G        | 96.16  | 48.88 |
