# Supplementary material
Source: publisher figshare collection journal article supplement (https://sage.figshare.com/ndownloader/files/14729096)
Supplement: Supplementary file 2 [file 14729096]

**Supplementary Table 2. Data assembly of transcripts and unigenes**

|             | Mean Length | N50 | N90 | Total<br>Nucleotides | Number<br>( >2kbp ) | Total<br>Number |
|-------------|-------------|-----|-----|----------------------|---------------------|-----------------|
| Transcripts | 581         | 830 | 249 | 156801059            | 10725               | 269658          |
| Unigenes    | 517         | 664 | 238 | 112225010            | 6373                | 217098          |
