# Supplementary material
Source: publisher figshare collection journal article supplement (https://sage.figshare.com/ndownloader/files/14729096)
Supplement: Supplementary file 3 [file 14729096]

**Supplementary Table 3. Statistics of unigene annotations**

|                                    | Number of Unigenes | Percentage (%) |
|------------------------------------|--------------------|----------------|
| Annotated in NR                    | 50064              | 23.06          |
| Annotated in NT                    | 46983              | 21.64          |
| Annotated in KO                    | 17150              | 7.89           |
| Annotated in SwissProt             | 41168              | 18.96          |
| Annotated in PFAM                  | 42449              | 19.55          |
| Annotated in GO                    | 43019              | 19.81          |
| Annotated in KOG                   | 19974              | 9.2            |
| Annotated in all Databases         | 7791               | 3.58           |
| Annotated in at least one Database | 83289              | 38.36          |
| Total Unigenes                     | 217098             | 100            |
