# Supplementary material
Source: publisher figshare collection journal article supplement (https://sage.figshare.com/ndownloader/files/14729096)
Supplement: Supplementary file 4 [file 14729096]

Archive with 4 entries (4 files):
- Supplemental Material/Supplementary Table 1.pdf
- Supplemental Material/Supplementary Table 2.pdf
- Supplemental Material/Supplementary Table 3.pdf
- Supplemental Material/Supplementary Table 4_xyz148760c2edc95.xls
