# Supplementary material
Source: publisher figshare collection journal article supplement (https://sage.figshare.com/ndownloader/files/14729096)
Supplement: Supplementary file 4 [file 14729096 › Supplemental Material/Supplementary Table 4_xyz148760c2edc95.xls]

## Sheet: F6hvsM6h_up.DEG
Supplementary Table 4. Different expression genes enriched KEGG pathway
##Databases: KEGG PATHWAY
##Statistical test method: hypergeometric test / Fisher's exact test
##FDR correction method: Benjamini and Hochberg
#Term	Database	ID	Input number	Background number	P-Value	Corrected P-Value	Input	Hyperlink
Flavonoid biosynthesis	KEGG PATHWAY	ko00941	3	68	2.98377e-05	0.000626593	c113690_g1|c113916_g1|c113916_g2	http://www.genome.jp/kegg-bin/show_pathway?ko00941/K00660%09red
Phenylalanine metabolism	KEGG PATHWAY	ko00360	2	190	0.0114653	0.0802573	c121946_g2|c118468_g3	http://www.genome.jp/kegg-bin/show_pathway?ko00360/K00430%09red
Phenylpropanoid biosynthesis	KEGG PATHWAY	ko00940	2	282	0.0239574	0.108868	c121946_g2|c118468_g3	http://www.genome.jp/kegg-bin/show_pathway?ko00940/K00430%09red
Linoleic acid metabolism	KEGG PATHWAY	ko00591	1	39	0.0333138	0.108868	c118874_g1	http://www.genome.jp/kegg-bin/show_pathway?ko00591/K00454%09red
Plant hormone signal transduction	KEGG PATHWAY	ko04075	2	349	0.0353735	0.108868	c120728_g1|c104621_g1	http://www.genome.jp/kegg-bin/show_pathway?ko04075/K14487%09red/K14504%09red
Isoquinoline alkaloid biosynthesis	KEGG PATHWAY	ko00950	1	48	0.0406606	0.108868	c120963_g1	http://www.genome.jp/kegg-bin/show_pathway?ko00950/K00422%09red
Sphingolipid metabolism	KEGG PATHWAY	ko00600	1	49	0.0414736	0.108868	c104185_g1	http://www.genome.jp/kegg-bin/show_pathway?ko00600/K04713%09red
Fatty acid elongation	KEGG PATHWAY	ko00062	1	64	0.0535888	0.113003	c116169_g2	http://www.genome.jp/kegg-bin/show_pathway?ko00062/K15397%09red
Sulfur metabolism	KEGG PATHWAY	ko00920	1	71	0.0591919	0.113003	c121124_g1	http://www.genome.jp/kegg-bin/show_pathway?ko00920/K05907%09red
Steroid biosynthesis	KEGG PATHWAY	ko00100	1	71	0.0591919	0.113003	c117892_g1	http://www.genome.jp/kegg-bin/show_pathway?ko00100/K09832%09red
alpha-Linolenic acid metabolism	KEGG PATHWAY	ko00592	1	86	0.071091	0.117384	c118874_g1	http://www.genome.jp/kegg-bin/show_pathway?ko00592/K00454%09red
Tyrosine metabolism	KEGG PATHWAY	ko00350	1	88	0.0726665	0.117384	c120963_g1	http://www.genome.jp/kegg-bin/show_pathway?ko00350/K00422%09red
Adipocytokine signaling pathway	KEGG PATHWAY	ko04920	1	138	0.111228	0.166842	c110191_g1	http://www.genome.jp/kegg-bin/show_pathway?ko04920/K07297%09red
Legionellosis	KEGG PATHWAY	ko05134	1	183	0.144608	0.202451	c102571_g1	http://www.genome.jp/kegg-bin/show_pathway?ko05134/K03231%09red
Non-alcoholic fatty liver disease (NAFLD)	KEGG PATHWAY	ko04932	1	253	0.194141	0.25481	c110191_g1	http://www.genome.jp/kegg-bin/show_pathway?ko04932/K07297%09red
AMPK signaling pathway	KEGG PATHWAY	ko04152	1	317	0.236999	0.280296	c110191_g1	http://www.genome.jp/kegg-bin/show_pathway?ko04152/K07297%09red
Plant-pathogen interaction	KEGG PATHWAY	ko04626	1	322	0.240254	0.280296	c96521_g1	http://www.genome.jp/kegg-bin/show_pathway?ko04626/K13424%09red
RNA transport	KEGG PATHWAY	ko03013	1	376	0.274556	0.291539	c102571_g1	http://www.genome.jp/kegg-bin/show_pathway?ko03013/K03231%09red
RNA degradation	KEGG PATHWAY	ko03018	1	381	0.277656	0.291539	c111402_g1	http://www.genome.jp/kegg-bin/show_pathway?ko03018/K12581%09red
Protein processing in endoplasmic reticulum	KEGG PATHWAY	ko04141	1	502	0.348887	0.348887	c120394_g2	http://www.genome.jp/kegg-bin/show_pathway?ko04141/K13993%09red
--------------------
#Term	Database	ID	Input number	Background number	P-Value	Corrected P-Value	Input	Hyperlink
--------------------
#Term	Database	ID	Input number	Background number	P-Value	Corrected P-Value	Input	Hyperlink
--------------------

## Sheet: F12hvsM12h_up.DEG
Supplementary Table 4. Different expression genes enriched KEGG pathway
##Databases: KEGG PATHWAY
##Statistical test method: hypergeometric test / Fisher's exact test
##FDR correction method: Benjamini and Hochberg
#Term	Database	ID	Input number	Background number	P-Value	Corrected P-Value	Input	Hyperlink
Starch and sucrose metabolism	KEGG PATHWAY	ko00500	9	365	3.55287e-05	0.00227384	c94420_g1|c108264_g1|c117443_g1|c116359_g1|c112961_g2|c117572_g1|c121101_g1|c95325_g1|c108888_g1	http://www.genome.jp/kegg-bin/show_pathway?ko00500/K00847%09red/K00975%09red/K00963%09red/K01835%09red/K00700%09red/K00688%09red/K00696%09red
Vitamin B6 metabolism	KEGG PATHWAY	ko00750	3	25	0.000231942	0.00561527	c121490_g2|c121490_g1|c108372_g2	http://www.genome.jp/kegg-bin/show_pathway?ko00750/K13248%09red
Flavonoid biosynthesis	KEGG PATHWAY	ko00941	4	68	0.000263216	0.00561527	c113690_g1|c105247_g1|c113916_g1|c113916_g2	http://www.genome.jp/kegg-bin/show_pathway?ko00941/K00588%09red/K00660%09red
Amino sugar and nucleotide sugar metabolism	KEGG PATHWAY	ko00520	6	219	0.000430717	0.00689147	c94420_g1|c108264_g1|c117572_g1|c110307_g1|c116359_g1|c95325_g1	http://www.genome.jp/kegg-bin/show_pathway?ko00520/K01835%09red/K00963%09red/K00847%09red/K00975%09red/K06118%09red
Plant hormone signal transduction	KEGG PATHWAY	ko04075	7	349	0.000886515	0.0113474	c107454_g1|c115633_g1|c114016_g1|c105419_g1|c113516_g3|c117107_g1|c110845_g1	http://www.genome.jp/kegg-bin/show_pathway?ko04075/K14487%09red/K14484%09red/K13422%09red/K14497%09red
Isoquinoline alkaloid biosynthesis	KEGG PATHWAY	ko00950	3	48	0.00137221	0.0124221	c107733_g1|c121956_g3|c114808_g1	http://www.genome.jp/kegg-bin/show_pathway?ko00950/K00422%09red
Phenylpropanoid biosynthesis	KEGG PATHWAY	ko00940	6	282	0.00154509	0.0124221	c115266_g1|c118468_g3|c115650_g1|c120335_g1|c119082_g1|c105247_g1	http://www.genome.jp/kegg-bin/show_pathway?ko00940/K00430%09red/K00083%09red/K01904%09red/K00588%09red
Phenylalanine metabolism	KEGG PATHWAY	ko00360	5	190	0.00155276	0.0124221	c115266_g1|c105247_g1|c115650_g1|c120335_g1|c118468_g3	http://www.genome.jp/kegg-bin/show_pathway?ko00360/K00430%09red/K01904%09red/K00588%09red
Drug metabolism - cytochrome P450	KEGG PATHWAY	ko00982	3	79	0.00529961	0.0339175	c104674_g1|c121473_g1|c110739_g1	http://www.genome.jp/kegg-bin/show_pathway?ko00982/K00799%09red
Chemical carcinogenesis	KEGG PATHWAY	ko05204	3	79	0.00529961	0.0339175	c104674_g1|c121473_g1|c110739_g1	http://www.genome.jp/kegg-bin/show_pathway?ko05204/K00799%09red
Metabolism of xenobiotics by cytochrome P450	KEGG PATHWAY	ko00980	3	82	0.00585595	0.034071	c104674_g1|c121473_g1|c110739_g1	http://www.genome.jp/kegg-bin/show_pathway?ko00980/K00799%09red
Tyrosine metabolism	KEGG PATHWAY	ko00350	3	88	0.00707023	0.0377079	c107733_g1|c121956_g3|c114808_g1	http://www.genome.jp/kegg-bin/show_pathway?ko00350/K00422%09red
Glycolysis / Gluconeogenesis	KEGG PATHWAY	ko00010	5	292	0.00918158	0.0452016	c109005_g2|c103781_g1|c105111_g1|c111964_g1|c116359_g1	http://www.genome.jp/kegg-bin/show_pathway?ko00010/K01835%09red/K01792%09red/K00134%09red/K00131%09red/K00927%09red
Circadian rhythm - plant	KEGG PATHWAY	ko04712	3	104	0.0109949	0.0502624	c113690_g1|c113916_g1|c113916_g2	http://www.genome.jp/kegg-bin/show_pathway?ko04712/K00660%09red
Carbon fixation in photosynthetic organisms	KEGG PATHWAY	ko00710	4	205	0.0126169	0.0538322	c109005_g2|c103781_g1|c115670_g1|c108036_g1	http://www.genome.jp/kegg-bin/show_pathway?ko00710/K00134%09red/K00615%09red/K01595%09red/K00927%09red
Pentose phosphate pathway	KEGG PATHWAY	ko00030	3	113	0.0136565	0.0546261	c108036_g1|c105111_g1|c116359_g1	http://www.genome.jp/kegg-bin/show_pathway?ko00030/K01835%09red/K00131%09red/K00615%09red
Photosynthesis - antenna proteins	KEGG PATHWAY	ko00196	2	41	0.014623	0.0550513	c115791_g3|c115791_g2	http://www.genome.jp/kegg-bin/show_pathway?ko00196/K08913%09red/K08912%09red
Biosynthesis of ansamycins	KEGG PATHWAY	ko01051	1	6	0.0295574	0.105093	c108036_g1	http://www.genome.jp/kegg-bin/show_pathway?ko01051/K00615%09red
Betalain biosynthesis	KEGG PATHWAY	ko00965	1	8	0.0378419	0.127468	c111945_g2	http://www.genome.jp/kegg-bin/show_pathway?ko00965/K15777%09red
Glycerophospholipid metabolism	KEGG PATHWAY	ko00564	3	174	0.0406308	0.130019	c117636_g1|c110096_g1|c105554_g1	http://www.genome.jp/kegg-bin/show_pathway?ko00564/K05929%09red/K01126%09red/K01114%09red
Glutathione metabolism	KEGG PATHWAY	ko00480	3	181	0.0447149	0.136274	c104674_g1|c121473_g1|c110739_g1	http://www.genome.jp/kegg-bin/show_pathway?ko00480/K00799%09red
Carbon metabolism	KEGG PATHWAY	ko01200	6	648	0.0625247	0.18189	c109005_g2|c115644_g1|c108036_g1|c103781_g1|c115670_g1|c105111_g1	http://www.genome.jp/kegg-bin/show_pathway?ko01200/K00134%09red/K00058%09red/K00131%09red/K00927%09red/K01595%09red/K00615%09red
Inositol phosphate metabolism	KEGG PATHWAY	ko00562	2	105	0.0770351	0.214359	c117636_g1|c107549_g1	http://www.genome.jp/kegg-bin/show_pathway?ko00562/K10047%09red/K01114%09red
Thiamine metabolism	KEGG PATHWAY	ko00730	1	20	0.0860946	0.229586	c116499_g1	http://www.genome.jp/kegg-bin/show_pathway?ko00730/K03146%09red
Glycerolipid metabolism	KEGG PATHWAY	ko00561	2	117	0.0923236	0.236349	c117323_g1|c110307_g1	http://www.genome.jp/kegg-bin/show_pathway?ko00561/K06119%09red/K06118%09red
Streptomycin biosynthesis	KEGG PATHWAY	ko00521	1	23	0.0977774	0.237683	c116359_g1	http://www.genome.jp/kegg-bin/show_pathway?ko00521/K01835%09red
Galactose metabolism	KEGG PATHWAY	ko00052	2	123	0.100272	0.237683	c95325_g1|c116359_g1	http://www.genome.jp/kegg-bin/show_pathway?ko00052/K01835%09red/K00963%09red
Riboflavin metabolism	KEGG PATHWAY	ko00740	1	26	0.109312	0.249856	c111492_g3	http://www.genome.jp/kegg-bin/show_pathway?ko00740/K14379%09red
Glycine, serine and threonine metabolism	KEGG PATHWAY	ko00260	2	145	0.130877	0.287711	c115644_g1|c113406_g2	http://www.genome.jp/kegg-bin/show_pathway?ko00260/K00827%09red/K00058%09red
Methane metabolism	KEGG PATHWAY	ko00680	2	149	0.136653	0.287711	c115644_g1|c115670_g1	http://www.genome.jp/kegg-bin/show_pathway?ko00680/K01595%09red/K00058%09red
Cutin, suberine and wax biosynthesis	KEGG PATHWAY	ko00073	1	34	0.13936	0.287711	c110550_g1	http://www.genome.jp/kegg-bin/show_pathway?ko00073/K15400%09red
Linoleic acid metabolism	KEGG PATHWAY	ko00591	1	39	0.157626	0.315253	c121089_g2	http://www.genome.jp/kegg-bin/show_pathway?ko00591/K15718%09red
Diterpenoid biosynthesis	KEGG PATHWAY	ko00904	1	54	0.210148	0.396891	c63837_g1	http://www.genome.jp/kegg-bin/show_pathway?ko00904/K04125%09red
Osteoclast differentiation	KEGG PATHWAY	ko04380	1	55	0.213531	0.396891	c111492_g3	http://www.genome.jp/kegg-bin/show_pathway?ko04380/K14379%09red
Biosynthesis of amino acids	KEGG PATHWAY	ko01230	4	554	0.21705	0.396891	c109005_g2|c115644_g1|c108036_g1|c103781_g1	http://www.genome.jp/kegg-bin/show_pathway?ko01230/K00615%09red/K00134%09red/K00058%09red/K00927%09red
Ether lipid metabolism	KEGG PATHWAY	ko00565	1	58	0.223596	0.397503	c117636_g1	http://www.genome.jp/kegg-bin/show_pathway?ko00565/K01114%09red
Ubiquinone and other terpenoid-quinone biosynthesis	KEGG PATHWAY	ko00130	1	60	0.230234	0.398242	c115266_g1	http://www.genome.jp/kegg-bin/show_pathway?ko00130/K01904%09red
Rheumatoid arthritis	KEGG PATHWAY	ko05323	1	62	0.236816	0.398848	c111492_g3	http://www.genome.jp/kegg-bin/show_pathway?ko05323/K14379%09red
Sulfur metabolism	KEGG PATHWAY	ko00920	1	71	0.26575	0.436103	c121124_g1	http://www.genome.jp/kegg-bin/show_pathway?ko00920/K05907%09red
Stilbenoid, diarylheptanoid and gingerol biosynthesis	KEGG PATHWAY	ko00945	1	81	0.296623	0.463737	c105247_g1	http://www.genome.jp/kegg-bin/show_pathway?ko00945/K00588%09red
Non-alcoholic fatty liver disease (NAFLD)	KEGG PATHWAY	ko04932	2	253	0.297694	0.463737	c114769_g1|c119841_g3	http://www.genome.jp/kegg-bin/show_pathway?ko04932/K07297%09red/K03935%09red
Ascorbate and aldarate metabolism	KEGG PATHWAY	ko00053	1	85	0.308609	0.463737	c107549_g1	http://www.genome.jp/kegg-bin/show_pathway?ko00053/K10047%09red
alpha-Linolenic acid metabolism	KEGG PATHWAY	ko00592	1	86	0.311573	0.463737	c118516_g1	http://www.genome.jp/kegg-bin/show_pathway?ko00592/K05894%09red
beta-Alanine metabolism	KEGG PATHWAY	ko00410	1	92	0.329097	0.478686	c120430_g2	http://www.genome.jp/kegg-bin/show_pathway?ko00410/K13366%09red
Carbon fixation pathways in prokaryotes	KEGG PATHWAY	ko00720	1	100	0.351775	0.494608	c115670_g1	http://www.genome.jp/kegg-bin/show_pathway?ko00720/K01595%09red
Alzheimer's disease	KEGG PATHWAY	ko05010	2	290	0.355499	0.494608	c103781_g1|c119841_g3	http://www.genome.jp/kegg-bin/show_pathway?ko05010/K00134%09red/K03935%09red
Insulin signaling pathway	KEGG PATHWAY	ko04910	2	310	0.386078	0.525723	c112961_g2|c121101_g1	http://www.genome.jp/kegg-bin/show_pathway?ko04910/K00688%09red
Thyroid hormone signaling pathway	KEGG PATHWAY	ko04919	1	118	0.400054	0.527839	c117636_g1	http://www.genome.jp/kegg-bin/show_pathway?ko04919/K01114%09red
Plant-pathogen interaction	KEGG PATHWAY	ko04626	2	322	0.404127	0.527839	c114016_g1|c113516_g3	http://www.genome.jp/kegg-bin/show_pathway?ko04626/K13422%09red
Phosphatidylinositol signaling system	KEGG PATHWAY	ko04070	1	123	0.41282	0.528409	c107549_g1	http://www.genome.jp/kegg-bin/show_pathway?ko04070/K10047%09red
Fructose and mannose metabolism	KEGG PATHWAY	ko00051	1	129	0.427783	0.536826	c94420_g1	http://www.genome.jp/kegg-bin/show_pathway?ko00051/K00847%09red
Alanine, aspartate and glutamate metabolism	KEGG PATHWAY	ko00250	1	135	0.442367	0.542817	c113406_g2	http://www.genome.jp/kegg-bin/show_pathway?ko00250/K00827%09red
Adipocytokine signaling pathway	KEGG PATHWAY	ko04920	1	138	0.44952	0.542817	c114769_g1	http://www.genome.jp/kegg-bin/show_pathway?ko04920/K07297%09red
Pentose and glucuronate interconversions	KEGG PATHWAY	ko00040	1	144	0.463554	0.549398	c95325_g1	http://www.genome.jp/kegg-bin/show_pathway?ko00040/K00963%09red
Oxidative phosphorylation	KEGG PATHWAY	ko00190	2	380	0.48747	0.567238	c97945_g1|c119841_g3	http://www.genome.jp/kegg-bin/show_pathway?ko00190/K01507%09red/K03935%09red
Arginine and proline metabolism	KEGG PATHWAY	ko00330	1	173	0.526535	0.598024	c120430_g2	http://www.genome.jp/kegg-bin/show_pathway?ko00330/K13366%09red
HIF-1 signaling pathway	KEGG PATHWAY	ko04066	1	176	0.532615	0.598024	c103781_g1	http://www.genome.jp/kegg-bin/show_pathway?ko04066/K00134%09red
Pyruvate metabolism	KEGG PATHWAY	ko00620	1	216	0.60665	0.669407	c115670_g1	http://www.genome.jp/kegg-bin/show_pathway?ko00620/K01595%09red
Parkinson's disease	KEGG PATHWAY	ko05012	1	258	0.671874	0.727911	c119841_g3	http://www.genome.jp/kegg-bin/show_pathway?ko05012/K03935%09red
Ubiquitin mediated proteolysis	KEGG PATHWAY	ko04120	1	267	0.684387	0.727911	c113218_g1	http://www.genome.jp/kegg-bin/show_pathway?ko04120/K10581%09red
Pyrimidine metabolism	KEGG PATHWAY	ko00240	1	274	0.69379	0.727911	c106832_g2	http://www.genome.jp/kegg-bin/show_pathway?ko00240/K00940%09red
AMPK signaling pathway	KEGG PATHWAY	ko04152	1	317	0.745749	0.769806	c114769_g1	http://www.genome.jp/kegg-bin/show_pathway?ko04152/K07297%09red
Huntington's disease	KEGG PATHWAY	ko05016	1	347	0.776716	0.789045	c119841_g3	http://www.genome.jp/kegg-bin/show_pathway?ko05016/K03935%09red
Purine metabolism	KEGG PATHWAY	ko00230	2	708	0.810047	0.810047	c106832_g2|c116359_g1	http://www.genome.jp/kegg-bin/show_pathway?ko00230/K01835%09red/K00940%09red
--------------------
#Term	Database	ID	Input number	Background number	P-Value	Corrected P-Value	Input	Hyperlink
--------------------
#Term	Database	ID	Input number	Background number	P-Value	Corrected P-Value	Input	Hyperlink
--------------------

## Sheet: F24hvsM24h_up.DEG
Supplementary Table 4. Different expression genes enriched KEGG pathway
##Databases: KEGG PATHWAY
##Statistical test method: hypergeometric test / Fisher's exact test
##FDR correction method: Benjamini and Hochberg
#Term	Database	ID	Input number	Background number	P-Value	Corrected P-Value	Input	Hyperlink
Biosynthesis of amino acids	KEGG PATHWAY	ko01230	69	554	4.65171e-05	0.0129783	c216850_g1|c103964_g1|c41475_g1|c107038_g1|c97638_g1|c159512_g1|c30473_g1|c122890_g1|c148844_g1|c98425_g1|c143541_g1|c195416_g1|c34343_g1|c97905_g2|c47994_g1|c102663_g1|c1974_g1|c118169_g4|c116512_g3|c118169_g6|c83344_g2|c93013_g3|c177172_g1|c140896_g1|c105978_g2|c9994_g1|c177771_g1|c60400_g1|c194990_g1|c25589_g1|c142186_g1|c195309_g1|c119167_g2|c213415_g1|c195512_g1|c195001_g1|c106890_g1|c59068_…	http://www.genome.jp/kegg-bin/show_pathway?ko01230/K00850%09red/K01689%09red/K01915%09red/K01681%09red/K00600%09red/K01623%09red/K01624%09red/K01626%09red/K00831%09red/K00873%09red/K01850%09red/K01647%09red/K00058%09red/K00134%09red/K00133%09red/K14454%09red/K01958%09red/K00264%09red/K01702%09red/K00814%09red/K00286%09red/K00052%09red/K00053%09red/K12524%09red/K17069%09red/K01649%09red/K05359%09r…
Proteasome	KEGG PATHWAY	ko03050	24	138	0.000257788	0.0359614	c125969_g1|c45261_g1|c43399_g1|c15251_g1|c198984_g1|c182723_g1|c140586_g1|c112551_g2|c146680_g1|c166343_g1|c47_g1|c159206_g1|c180321_g1|c217866_g1|c27484_g1|c129529_g1|c140810_g1|c140804_g1|c140745_g1|c15989_g2|c177905_g1|c198096_g1|c213355_g1|c214518_g1	http://www.genome.jp/kegg-bin/show_pathway?ko03050/K03064%09red/K03065%09red/K03062%09red/K03063%09red/K02728%09red/K02729%09red/K02725%09red/K02726%09red/K02727%09red/K03039%09red/K03037%09red/K03035%09red/K03033%09red/K03032%09red/K03030%09red/K02739%09red/K02738%09red/K02732%09red/K02731%09red/K02730%09red/K02737%09red/K02736%09red/K02735%09red/K02734%09red
Ribosome	KEGG PATHWAY	ko03010	86	795	0.000478162	0.0444691	c36890_g1|c35651_g1|c212897_g1|c203823_g1|c213496_g1|c195039_g1|c122730_g1|c195148_g1|c177032_g1|c48192_g1|c194946_g1|c214096_g1|c159732_g1|c140541_g1|c145256_g1|c214007_g1|c197273_g1|c213375_g1|c122754_g1|c214060_g1|c142443_g1|c114405_g1|c212818_g1|c194771_g1|c177293_g1|c141311_g1|c159265_g1|c158787_g1|c159987_g1|c163492_g1|c215505_g1|c214109_g1|c196681_g1|c212608_g1|c142237_g1|c142310_g1|c19601…	http://www.genome.jp/kegg-bin/show_pathway?ko03010/K02953%09red/K02951%09red/K02912%09red/K02901%09red/K02954%09red/K02941%09red/K02915%09red/K02894%09red/K02998%09red/K02936%09red/K02925%09red/K02957%09red/K02930%09red/K02933%09red/K02918%09red/K02889%09red/K02866%09red/K02937%09red/K02950%09red/K02885%09red/K02938%09red/K02883%09red/K02868%09red/K02917%09red/K02880%09red/K02959%09red/K02882%09r…
Alanine, aspartate and glutamate metabolism	KEGG PATHWAY	ko00250	22	135	0.000978856	0.0682752	c212727_g1|c103964_g1|c143541_g1|c212653_g1|c85447_g1|c11678_g1|c1974_g1|c93013_g3|c194990_g1|c196548_g1|c213018_g1|c126472_g1|c128877_g1|c19711_g1|c162022_g1|c125627_g1|c161353_g1|c141948_g1|c97885_g1|c107689_g1|c177443_g1|c122406_g1	http://www.genome.jp/kegg-bin/show_pathway?ko00250/K01580%09red/K01755%09red/K00261%09red/K14455%09red/K14454%09red/K00264%09red/K01956%09red/K17761%09red/K00278%09red/K01953%09red/K01940%09red/K00811%09red/K01756%09red/K01939%09red/K00764%09red/K01915%09red/K00814%09red/K00262%09red/K00820%09red
Salmonella infection	KEGG PATHWAY	ko05132	12	53	0.00129766	0.0724095	c94639_g1|c30939_g1|c212841_g1|c145165_g1|c107161_g1|c213088_g1|c212628_g1|c34038_g1|c124873_g1|c55465_g1|c2589_g1|c84214_g1	http://www.genome.jp/kegg-bin/show_pathway?ko05132/K05758%09red/K05759%09red/K04392%09red/K04371%09red/K05755%09red/K07897%09red/K05757%09red
Isoquinoline alkaloid biosynthesis	KEGG PATHWAY	ko00950	11	48	0.00187478	0.0871771	c117878_g1|c121956_g3|c177443_g1|c141948_g1|c121956_g2|c120963_g2|c107733_g1|c121530_g1|c120963_g1|c143541_g1|c125627_g1	http://www.genome.jp/kegg-bin/show_pathway?ko00950/K00811%09red/K00422%09red/K14455%09red/K14454%09red
Shigellosis	KEGG PATHWAY	ko05131	12	57	0.00220973	0.0880735	c94639_g1|c30939_g1|c81058_g1|c145165_g1|c107161_g1|c213088_g1|c212628_g1|c34038_g1|c124873_g1|c55465_g1|c2589_g1|c84214_g1	http://www.genome.jp/kegg-bin/show_pathway?ko05131/K12836%09red/K05758%09red/K05759%09red/K04392%09red/K04371%09red/K05755%09red/K05757%09red
Phenylalanine metabolism	KEGG PATHWAY	ko00360	26	190	0.00333519	0.116315	c115369_g3|c144845_g1|c120863_g3|c119712_g1|c143541_g1|c120863_g2|c114109_g1|c121946_g2|c118735_g1|c95400_g1|c115650_g1|c120335_g1|c102203_g1|c120528_g5|c120528_g2|c120528_g1|c118905_g1|c125627_g1|c141948_g1|c119312_g1|c118468_g3|c112704_g1|c177443_g1|c115218_g2|c159307_g1|c117424_g2	http://www.genome.jp/kegg-bin/show_pathway?ko00360/K14455%09red/K14454%09red/K00487%09red/K00811%09red/K11188%09red/K00430%09red/K01426%09red/K10775%09red
Osteoclast differentiation	KEGG PATHWAY	ko04380	11	55	0.00465693	0.131654	c94639_g1|c111492_g2|c100584_g1|c12257_g1|c107161_g1|c213088_g1|c178339_g1|c124873_g1|c55465_g1|c2589_g1|c84214_g1	http://www.genome.jp/kegg-bin/show_pathway?ko04380/K04371%09red/K14379%09red/K04368%09red/K04392%09red/K06268%09red
Phenylalanine, tyrosine and tryptophan biosynthesis	KEGG PATHWAY	ko00400	13	72	0.00473323	0.131654	c119167_g2|c116512_g3|c116512_g2|c195001_g1|c177443_g1|c141948_g1|c194803_g1|c195512_g1|c143541_g1|c97905_g2|c47994_g1|c102663_g1|c125627_g1	http://www.genome.jp/kegg-bin/show_pathway?ko00400/K14455%09red/K14454%09red/K01696%09red/K01736%09red/K00811%09red/K01735%09red/K01626%09red/K01850%09red/K05359%09red/K00800%09red
Natural killer cell mediated cytotoxicity	KEGG PATHWAY	ko04650	10	48	0.00533359	0.131654	c94639_g1|c100584_g1|c12257_g1|c107161_g1|c213088_g1|c178339_g1|c124873_g1|c55465_g1|c2589_g1|c84214_g1	http://www.genome.jp/kegg-bin/show_pathway?ko04650/K04371%09red/K04368%09red/K04392%09red/K06268%09red
VEGF signaling pathway	KEGG PATHWAY	ko04370	10	49	0.00603947	0.131654	c94639_g1|c100584_g1|c12257_g1|c107161_g1|c213088_g1|c178339_g1|c124873_g1|c55465_g1|c2589_g1|c84214_g1	http://www.genome.jp/kegg-bin/show_pathway?ko04370/K04371%09red/K04368%09red/K04392%09red/K06268%09red
2-Oxocarboxylic acid metabolism	KEGG PATHWAY	ko01210	20	140	0.00613442	0.131654	c213415_g1|c59068_g1|c216850_g1|c41475_g1|c15977_g1|c177443_g1|c141948_g1|c177172_g1|c159512_g1|c9994_g1|c122890_g1|c148844_g1|c93013_g3|c143541_g1|c213295_g1|c123569_g1|c125627_g1|c214885_g1|c142186_g1|c74063_g1	http://www.genome.jp/kegg-bin/show_pathway?ko01210/K01652%09red/K00133%09red/K14454%09red/K01681%09red/K00052%09red/K01702%09red/K00811%09red/K00826%09red/K00814%09red/K00928%09red/K14455%09red/K00053%09red/K01649%09red/K01647%09red/K00030%09red/K00031%09red
Phagosome	KEGG PATHWAY	ko04145	25	192	0.00689867	0.137481	c106641_g1|c212841_g1|c161365_g1|c144677_g1|c126931_g1|c98446_g2|c176913_g1|c37771_g1|c141318_g1|c217439_g1|c39008_g1|c124873_g1|c215190_g1|c84214_g1|c161297_g1|c141758_g1|c52458_g1|c12553_g1|c143705_g1|c177122_g1|c162066_g1|c94639_g1|c127081_g1|c159709_g1|c2589_g1	http://www.genome.jp/kegg-bin/show_pathway?ko04145/K02145%09red/K08054%09red/K10956%09red/K07374%09red/K07375%09red/K07342%09red/K07889%09red/K04392%09red/K02146%09red/K02147%09red/K02149%09red/K02151%09red/K02155%09red/K07897%09red/K02150%09red
Citrate cycle (TCA cycle)	KEGG PATHWAY	ko00020	24	184	0.00784974	0.141122	c195212_g1|c160769_g1|c159512_g1|c122890_g1|c158835_g1|c214885_g1|c83344_g2|c214467_g1|c199089_g1|c177172_g1|c57650_g2|c57650_g1|c15977_g1|c194676_g1|c142186_g1|c177262_g1|c159814_g1|c126451_g1|c33207_g1|c125962_g1|c108947_g4|c82988_g2|c212637_g1|c141527_g1	http://www.genome.jp/kegg-bin/show_pathway?ko00020/K01958%09red/K01899%09red/K00658%09red/K00164%09red/K01679%09red/K00161%09red/K00162%09red/K01681%09red/K01900%09red/K01648%09red/K00234%09red/K00235%09red/K00382%09red/K00026%09red/K00627%09red/K01647%09red/K00030%09red/K00031%09red
B cell receptor signaling pathway	KEGG PATHWAY	ko04662	11	60	0.00814826	0.141122	c94639_g1|c100584_g1|c12257_g1|c107161_g1|c213088_g1|c84214_g1|c178339_g1|c124873_g1|c55465_g1|c2589_g1|c2120_g1	http://www.genome.jp/kegg-bin/show_pathway?ko04662/K04371%09red/K03083%09red/K04368%09red/K04392%09red/K06268%09red
Chemokine signaling pathway	KEGG PATHWAY	ko04062	10	52	0.00859885	0.141122	c91507_g1|c100584_g1|c107161_g1|c94639_g1|c213088_g1|c2120_g1|c124873_g1|c55465_g1|c2589_g1|c84214_g1	http://www.genome.jp/kegg-bin/show_pathway?ko04062/K04371%09red/K04536%09red/K04368%09red/K04392%09red/K03083%09red
Non-alcoholic fatty liver disease (NAFLD)	KEGG PATHWAY	ko04932	30	253	0.0106386	0.164899	c180427_g1|c92787_g1|c216145_g1|c214752_g1|c163880_g1|c216806_g1|c87221_g2|c94639_g1|c214467_g1|c141711_g1|c124873_g1|c199401_g1|c84214_g1|c159637_g1|c196431_g1|c107258_g1|c213838_g1|c214018_g1|c194906_g1|c141511_g1|c200826_g1|c176930_g1|c121210_g3|c2589_g1|c141011_g1|c183842_g1|c141527_g1|c1077_g1|c2120_g1|c179533_g1	http://www.genome.jp/kegg-bin/show_pathway?ko04932/K03083%09red/K03946%09red/K07198%09red/K04392%09red/K03963%09red/K03943%09red/K03942%09red/K03941%09red/K03940%09red/K08738%09red/K02267%09red/K07297%09red/K11353%09red/K02265%09red/K03237%09red/K00417%09red/K00411%09red/K00413%09red/K07200%09red/K03955%09red/K03953%09red/K00234%09red/K00235%09red/K03936%09red/K03934%09red
Alzheimer's disease	KEGG PATHWAY	ko05010	33	290	0.0129046	0.177939	c180427_g1|c216145_g1|c214752_g1|c163880_g1|c141511_g1|c216806_g1|c107161_g1|c140668_g1|c214467_g1|c141711_g1|c217469_g1|c1077_g1|c199401_g1|c196032_g1|c159637_g1|c196431_g1|c141061_g1|c214018_g1|c12257_g1|c194906_g1|c178339_g1|c55465_g1|c200826_g1|c178540_g1|c36301_g1|c213088_g1|c141011_g1|c183842_g1|c141527_g1|c48335_g1|c2120_g1|c122420_g1|c179533_g1	http://www.genome.jp/kegg-bin/show_pathway?ko05010/K03083%09red/K03946%09red/K02133%09red/K02132%09red/K02134%09red/K02137%09red/K02136%09red/K03963%09red/K00134%09red/K03943%09red/K03942%09red/K03941%09red/K03940%09red/K08738%09red/K04371%09red/K06268%09red/K02183%09red/K11353%09red/K02265%09red/K02267%09red/K00417%09red/K00411%09red/K00413%09red/K03955%09red/K03953%09red/K00234%09red/K00235%09r…
Epithelial cell signaling in Helicobacter pylori infection	KEGG PATHWAY	ko05120	12	74	0.0132941	0.177939	c141318_g1|c161297_g1|c12553_g1|c177122_g1|c144677_g1|c94639_g1|c126931_g1|c124873_g1|c98446_g2|c2589_g1|c176913_g1|c84214_g1	http://www.genome.jp/kegg-bin/show_pathway?ko05120/K02145%09red/K02146%09red/K02147%09red/K02149%09red/K02155%09red/K02150%09red/K02151%09red/K04392%09red
Axon guidance	KEGG PATHWAY	ko04360	11	65	0.0133932	0.177939	c94639_g1|c122909_g1|c12257_g1|c107161_g1|c213088_g1|c84214_g1|c178339_g1|c124873_g1|c55465_g1|c2589_g1|c2120_g1	http://www.genome.jp/kegg-bin/show_pathway?ko04360/K04371%09red/K05765%09red/K03083%09red/K04392%09red/K06268%09red
Fc epsilon RI signaling pathway	KEGG PATHWAY	ko04664	8	40	0.0147817	0.187459	c94639_g1|c100584_g1|c107161_g1|c213088_g1|c124873_g1|c55465_g1|c2589_g1|c84214_g1	http://www.genome.jp/kegg-bin/show_pathway?ko04664/K04371%09red/K04368%09red/K04392%09red
Tyrosine metabolism	KEGG PATHWAY	ko00350	13	88	0.0192649	0.233691	c117878_g1|c131521_g1|c121956_g3|c177443_g1|c141948_g1|c158911_g1|c121956_g2|c120963_g2|c107733_g1|c121530_g1|c120963_g1|c143541_g1|c125627_g1	http://www.genome.jp/kegg-bin/show_pathway?ko00350/K14455%09red/K14454%09red/K00811%09red/K01557%09red/K00121%09red/K00422%09red
Retrograde endocannabinoid signaling	KEGG PATHWAY	ko04723	5	20	0.0244366	0.272713	c107161_g1|c91507_g1|c213088_g1|c55465_g1|c111324_g2	http://www.genome.jp/kegg-bin/show_pathway?ko04723/K04371%09red/K04536%09red/K15015%09red
Serotonergic synapse	KEGG PATHWAY	ko04726	5	20	0.0244366	0.272713	c107161_g1|c91507_g1|c213088_g1|c55465_g1|c100584_g1	http://www.genome.jp/kegg-bin/show_pathway?ko04726/K04371%09red/K04536%09red/K04368%09red
Focal adhesion	KEGG PATHWAY	ko04510	11	73	0.0266071	0.285514	c94639_g1|c33508_g1|c100584_g1|c107161_g1|c213088_g1|c2120_g1|c124873_g1|c55465_g1|c2589_g1|c84214_g1|c160930_g1	http://www.genome.jp/kegg-bin/show_pathway?ko04510/K04371%09red/K04368%09red/K06269%09red/K04392%09red/K03083%09red
Viral myocarditis	KEGG PATHWAY	ko05416	6	30	0.0328352	0.330751	c216145_g1|c94639_g1|c124873_g1|c112739_g2|c2589_g1|c84214_g1	http://www.genome.jp/kegg-bin/show_pathway?ko05416/K04392%09red/K03260%09red/K08738%09red
Pathogenic Escherichia coli infection	KEGG PATHWAY	ko05130	11	76	0.0334121	0.330751	c106641_g1|c30939_g1|c141758_g1|c162066_g1|c217439_g1|c34038_g1|c161365_g1|c212628_g1|c127081_g1|c159709_g1|c49607_g1	http://www.genome.jp/kegg-bin/show_pathway?ko05130/K11294%09red/K07374%09red/K07375%09red/K05758%09red/K05755%09red/K05757%09red
Gap junction	KEGG PATHWAY	ko04540	11	77	0.0359313	0.330751	c106641_g1|c141758_g1|c162066_g1|c217439_g1|c161365_g1|c107161_g1|c213088_g1|c127081_g1|c159709_g1|c55465_g1|c100584_g1	http://www.genome.jp/kegg-bin/show_pathway?ko04540/K04371%09red/K04368%09red/K07374%09red/K07375%09red
Flavonoid biosynthesis	KEGG PATHWAY	ko00941	10	68	0.0380658	0.330751	c116865_g1|c113916_g1|c113916_g2|c113916_g3|c113690_g1|c111555_g1|c104818_g1|c122026_g1|c119712_g1|c111194_g1	http://www.genome.jp/kegg-bin/show_pathway?ko00941/K05278%09red/K00487%09red/K00660%09red
Regulation of actin cytoskeleton	KEGG PATHWAY	ko04810	15	119	0.0388705	0.330751	c94639_g1|c30939_g1|c33508_g1|c122909_g1|c100584_g1|c145165_g1|c107161_g1|c213088_g1|c212628_g1|c34038_g1|c124873_g1|c55465_g1|c2589_g1|c84214_g1|c160930_g1	http://www.genome.jp/kegg-bin/show_pathway?ko04810/K05758%09red/K05759%09red/K04368%09red/K04392%09red/K04371%09red/K05765%09red/K06269%09red/K05755%09red/K05757%09red
Amyotrophic lateral sclerosis (ALS)	KEGG PATHWAY	ko05014	9	59	0.0399949	0.330751	c212760_g1|c216145_g1|c94639_g1|c12257_g1|c178339_g1|c124873_g1|c2589_g1|c141069_g1|c84214_g1	http://www.genome.jp/kegg-bin/show_pathway?ko05014/K03781%09red/K08738%09red/K04565%09red/K04392%09red/K06268%09red
Chemical carcinogenesis	KEGG PATHWAY	ko05204	11	79	0.041363	0.330751	c120450_g4|c158911_g1|c110739_g1|c119328_g1|c212952_g1|c120026_g2|c120026_g1|c104674_g1|c120618_g2|c102036_g1|c120196_g1	http://www.genome.jp/kegg-bin/show_pathway?ko05204/K00121%09red/K00816%09red/K00799%09red
Prion diseases	KEGG PATHWAY	ko05020	8	50	0.0415023	0.330751	c100584_g1|c107161_g1|c196159_g1|c213088_g1|c215544_g1|c9827_g1|c55465_g1|c141069_g1	http://www.genome.jp/kegg-bin/show_pathway?ko05020/K04371%09red/K09553%09red/K04368%09red/K09490%09red/K04565%09red
Collecting duct acid secretion	KEGG PATHWAY	ko04966	8	50	0.0415023	0.330751	c141318_g1|c161297_g1|c12553_g1|c177122_g1|c144677_g1|c126931_g1|c98446_g2|c176913_g1	http://www.genome.jp/kegg-bin/show_pathway?ko04966/K02145%09red/K02146%09red/K02147%09red/K02149%09red/K02155%09red/K02151%09red/K02150%09red
Fc gamma R-mediated phagocytosis	KEGG PATHWAY	ko04666	16	132	0.0442541	0.330751	c45782_g1|c94639_g1|c30939_g1|c120918_g2|c120918_g3|c122909_g1|c100584_g1|c96360_g1|c107161_g1|c213088_g1|c212628_g1|c34038_g1|c124873_g1|c55465_g1|c2589_g1|c84214_g1	http://www.genome.jp/kegg-bin/show_pathway?ko04666/K04688%09red/K01115%09red/K05758%09red/K05765%09red/K04368%09red/K04392%09red/K04371%09red/K05755%09red/K05757%09red
Valine, leucine and isoleucine biosynthesis	KEGG PATHWAY	ko00290	8	51	0.0452686	0.330751	c59068_g1|c216850_g1|c41475_g1|c213295_g1|c9994_g1|c148844_g1|c198428_g1|c123569_g1	http://www.genome.jp/kegg-bin/show_pathway?ko00290/K01754%09red/K00052%09red/K00053%09red/K00826%09red/K01649%09red/K01652%09red/K01702%09red
Carbon metabolism	KEGG PATHWAY	ko01200	60	648	0.0461552	0.330751	c212873_g1|c195212_g1|c160769_g1|c34343_g1|c142639_g1|c97638_g1|c159512_g1|c30473_g1|c122890_g1|c158835_g1|c195309_g1|c143541_g1|c195416_g1|c214885_g1|c159101_g1|c118169_g4|c118169_g6|c83344_g2|c214467_g1|c93013_g3|c199089_g1|c177172_g1|c107038_g1|c158911_g1|c57650_g2|c57650_g1|c60400_g1|c15977_g1|c194676_g1|c142186_g1|c215272_g1|c177262_g1|c159814_g1|c158888_g1|c195236_g1|c126451_g1|c30085_g1|c5…	http://www.genome.jp/kegg-bin/show_pathway?ko01200/K00850%09red/K01689%09red/K00831%09red/K01681%09red/K00600%09red/K01623%09red/K01624%09red/K01810%09red/K00873%09red/K00627%09red/K00626%09red/K00134%09red/K14455%09red/K14454%09red/K01958%09red/K00814%09red/K01647%09red/K01899%09red/K00036%09red/K00234%09red/K00033%09red/K00030%09red/K00031%09red/K01754%09red/K00844%09red/K01100%09red/K01679%09r…
Selenocompound metabolism	KEGG PATHWAY	ko00450	6	33	0.0463573	0.330751	c212952_g1|c46972_g2|c37283_g1|c25589_g1|c140896_g1|c122424_g1	http://www.genome.jp/kegg-bin/show_pathway?ko00450/K00384%09red/K00958%09red/K01874%09red/K00816%09red/K01760%09red/K00549%09red
Cysteine and methionine metabolism	KEGG PATHWAY	ko00270	23	211	0.0483031	0.330751	c103225_g1|c98425_g1|c177771_g1|c143541_g1|c62461_g1|c120958_g3|c14971_g1|c140896_g1|c57650_g2|c57650_g1|c25589_g1|c195725_g1|c177262_g1|c106890_g1|c177053_g1|c121374_g1|c125627_g1|c213415_g1|c141948_g1|c105978_g2|c49511_g1|c177443_g1|c74063_g1	http://www.genome.jp/kegg-bin/show_pathway?ko00270/K01762%09red/K00133%09red/K14454%09red/K14455%09red/K01697%09red/K08967%09red/K01251%09red/K01011%09red/K00797%09red/K00811%09red/K12524%09red/K17069%09red/K00789%09red/K00928%09red/K01760%09red/K00026%09red/K00549%09red
Pentose phosphate pathway	KEGG PATHWAY	ko00030	14	113	0.0499534	0.330751	c142639_g1|c118202_g1|c34283_g1|c34343_g1|c107038_g1|c195236_g1|c118202_g2|c97638_g1|c158888_g1|c57411_g1|c195416_g1|c119213_g4|c115501_g1|c45740_g1	http://www.genome.jp/kegg-bin/show_pathway?ko00030/K00850%09red/K01810%09red/K00616%09red/K00948%09red/K01623%09red/K01783%09red/K00615%09red/K00036%09red/K01624%09red/K00033%09red
Rheumatoid arthritis	KEGG PATHWAY	ko05323	9	62	0.0505581	0.330751	c141318_g1|c161297_g1|c12553_g1|c111492_g2|c177122_g1|c144677_g1|c126931_g1|c98446_g2|c176913_g1	http://www.genome.jp/kegg-bin/show_pathway?ko05323/K14379%09red/K02145%09red/K02146%09red/K02147%09red/K02149%09red/K02155%09red/K02151%09red/K02150%09red
Parkinson's disease	KEGG PATHWAY	ko05012	27	258	0.0509759	0.330751	c180427_g1|c216145_g1|c214752_g1|c163880_g1|c216806_g1|c140668_g1|c214467_g1|c141711_g1|c217469_g1|c199401_g1|c196032_g1|c159637_g1|c196431_g1|c141061_g1|c214018_g1|c194844_g1|c194906_g1|c141511_g1|c200826_g1|c15223_g1|c178540_g1|c141011_g1|c183842_g1|c141527_g1|c1077_g1|c122420_g1|c179533_g1	http://www.genome.jp/kegg-bin/show_pathway?ko05012/K10575%09red/K05863%09red/K03946%09red/K02133%09red/K02132%09red/K02134%09red/K02137%09red/K02136%09red/K03963%09red/K03943%09red/K03942%09red/K03941%09red/K03940%09red/K08738%09red/K11353%09red/K02265%09red/K02267%09red/K00417%09red/K00411%09red/K00413%09red/K03955%09red/K03953%09red/K00234%09red/K00235%09red/K03936%09red/K03934%09red
Ras signaling pathway	KEGG PATHWAY	ko04014	14	115	0.0556188	0.333272	c91507_g1|c120918_g2|c120918_g3|c100584_g1|c36301_g1|c107161_g1|c94639_g1|c213088_g1|c84214_g1|c52458_g1|c124873_g1|c55465_g1|c2589_g1|c37771_g1	http://www.genome.jp/kegg-bin/show_pathway?ko04014/K04536%09red/K01115%09red/K04368%09red/K07889%09red/K04392%09red/K04371%09red/K02183%09red
T cell receptor signaling pathway	KEGG PATHWAY	ko04660	7	44	0.0558119	0.333272	c100584_g1|c12257_g1|c107161_g1|c213088_g1|c2120_g1|c178339_g1|c55465_g1	http://www.genome.jp/kegg-bin/show_pathway?ko04660/K04371%09red/K04368%09red/K06268%09red/K03083%09red
TNF signaling pathway	KEGG PATHWAY	ko04668	6	35	0.0570372	0.333272	c100584_g1|c107161_g1|c213088_g1|c60847_g1|c160416_g1|c55465_g1	http://www.genome.jp/kegg-bin/show_pathway?ko04668/K04371%09red/K17065%09red/K04368%09red
MAPK signaling pathway - fly	KEGG PATHWAY	ko04013	4	18	0.0582338	0.333272	c107161_g1|c213088_g1|c55465_g1|c100584_g1	http://www.genome.jp/kegg-bin/show_pathway?ko04013/K04371%09red/K04368%09red
Rap1 signaling pathway	KEGG PATHWAY	ko04015	10	74	0.0582507	0.333272	c94639_g1|c100584_g1|c36301_g1|c145165_g1|c107161_g1|c213088_g1|c124873_g1|c55465_g1|c2589_g1|c84214_g1	http://www.genome.jp/kegg-bin/show_pathway?ko04015/K04371%09red/K05759%09red/K04368%09red/K04392%09red/K02183%09red
Renal cell carcinoma	KEGG PATHWAY	ko05211	9	64	0.0585317	0.333272	c94639_g1|c100584_g1|c107161_g1|c213088_g1|c212637_g1|c124873_g1|c55465_g1|c2589_g1|c84214_g1	http://www.genome.jp/kegg-bin/show_pathway?ko05211/K04371%09red/K04368%09red/K01679%09red/K04392%09red
Pancreatic cancer	KEGG PATHWAY	ko05212	8	55	0.0625336	0.345384	c94639_g1|c100584_g1|c107161_g1|c213088_g1|c124873_g1|c55465_g1|c2589_g1|c84214_g1	http://www.genome.jp/kegg-bin/show_pathway?ko05212/K04371%09red/K04368%09red/K04392%09red
Proteoglycans in cancer	KEGG PATHWAY	ko05205	16	140	0.0653218	0.345384	c45782_g1|c158733_g1|c33508_g1|c62385_g1|c100584_g1|c96360_g1|c94783_g1|c107161_g1|c94639_g1|c213088_g1|c121649_g2|c124873_g1|c55465_g1|c2589_g1|c84214_g1|c160930_g1	http://www.genome.jp/kegg-bin/show_pathway?ko05205/K04368%09red/K12823%09red/K04688%09red/K02991%09red/K04392%09red/K03258%09red/K04371%09red/K06269%09red
Vibrio cholerae infection	KEGG PATHWAY	ko05110	12	97	0.0665057	0.345384	c141318_g1|c161297_g1|c140764_g1|c12553_g1|c177122_g1|c144677_g1|c126931_g1|c143705_g1|c215190_g1|c98446_g2|c176913_g1|c67415_g1	http://www.genome.jp/kegg-bin/show_pathway?ko05110/K10956%09red/K10950%09red/K07342%09red/K07937%09red/K02146%09red/K02147%09red/K02149%09red/K02145%09red/K02155%09red/K02151%09red/K02150%09red
Leukocyte transendothelial migration	KEGG PATHWAY	ko04670	4	19	0.0668486	0.345384	c94639_g1|c124873_g1|c2589_g1|c84214_g1	http://www.genome.jp/kegg-bin/show_pathway?ko04670/K04392%09red
Thyroid cancer	KEGG PATHWAY	ko05216	4	19	0.0668486	0.345384	c107161_g1|c213088_g1|c55465_g1|c100584_g1	http://www.genome.jp/kegg-bin/show_pathway?ko05216/K04371%09red/K04368%09red
Aminoacyl-tRNA biosynthesis	KEGG PATHWAY	ko00970	15	132	0.0751011	0.380968	c15078_g1|c169781_g1|c199512_g1|c46166_g1|c12133_g1|c31456_g1|c15710_g1|c141775_g1|c23105_g2|c37283_g1|c30096_g1|c117137_g1|c122147_g1|c71135_g1|c122723_g1	http://www.genome.jp/kegg-bin/show_pathway?ko00970/K01890%09red/K01885%09red/K01872%09red/K01880%09red/K01873%09red/K04567%09red/K01875%09red/K01874%09red/K01876%09red/K01868%09red/K01869%09red/K01893%09red/K01892%09red/K01867%09red
Drug metabolism - cytochrome P450	KEGG PATHWAY	ko00982	10	79	0.079601	0.396584	c158911_g1|c120618_g2|c119328_g1|c110739_g1|c120026_g2|c120026_g1|c104674_g1|c120450_g4|c102036_g1|c120196_g1	http://www.genome.jp/kegg-bin/show_pathway?ko00982/K00121%09red/K00799%09red
Oxidative phosphorylation	KEGG PATHWAY	ko00190	36	380	0.0815773	0.396686	c121167_g3|c180427_g1|c144677_g1|c126931_g1|c214752_g1|c163880_g1|c216806_g1|c98446_g2|c176913_g1|c141318_g1|c140668_g1|c214467_g1|c112023_g1|c123847_g1|c217469_g1|c194904_g1|c199401_g1|c196032_g1|c159637_g1|c196431_g1|c161297_g1|c141061_g1|c214018_g1|c194906_g1|c141511_g1|c12553_g1|c200826_g1|c178540_g1|c177122_g1|c141711_g1|c141011_g1|c183842_g1|c141527_g1|c1077_g1|c122420_g1|c179533_g1	http://www.genome.jp/kegg-bin/show_pathway?ko00190/K01507%09red/K02155%09red/K02132%09red/K02133%09red/K02137%09red/K02150%09red/K03963%09red/K03943%09red/K03942%09red/K03941%09red/K03940%09red/K03946%09red/K02134%09red/K02151%09red/K02136%09red/K01535%09red/K02145%09red/K02146%09red/K02147%09red/K02149%09red/K11353%09red/K02265%09red/K02267%09red/K00417%09red/K00411%09red/K00413%09red/K03955%09r…
Long-term depression	KEGG PATHWAY	ko04730	6	39	0.0824652	0.396686	c125302_g1|c100584_g1|c107161_g1|c213088_g1|c162401_g1|c55465_g1	http://www.genome.jp/kegg-bin/show_pathway?ko04730/K04371%09red/K04382%09red/K03456%09red/K04368%09red
Platelet activation	KEGG PATHWAY	ko04611	5	30	0.0858745	0.399316	c107161_g1|c213088_g1|c33508_g1|c55465_g1|c160930_g1	http://www.genome.jp/kegg-bin/show_pathway?ko04611/K04371%09red/K06269%09red
Cholinergic synapse	KEGG PATHWAY	ko04725	5	30	0.0858745	0.399316	c107161_g1|c91507_g1|c213088_g1|c55465_g1|c100584_g1	http://www.genome.jp/kegg-bin/show_pathway?ko04725/K04371%09red/K04536%09red/K04368%09red
Metabolism of xenobiotics by cytochrome P450	KEGG PATHWAY	ko00980	10	82	0.0944527	0.422103	c158911_g1|c120618_g2|c119328_g1|c110739_g1|c120026_g2|c120026_g1|c104674_g1|c120450_g4|c102036_g1|c120196_g1	http://www.genome.jp/kegg-bin/show_pathway?ko00980/K00121%09red/K00799%09red
Glutamatergic synapse	KEGG PATHWAY	ko04724	9	72	0.0981585	0.422103	c91507_g1|c120918_g2|c120918_g3|c12257_g1|c107161_g1|c213088_g1|c194990_g1|c178339_g1|c55465_g1	http://www.genome.jp/kegg-bin/show_pathway?ko04724/K04371%09red/K04536%09red/K01915%09red/K06268%09red/K01115%09red
Type II diabetes mellitus	KEGG PATHWAY	ko04930	9	72	0.0981585	0.422103	c118169_g4|c118169_g6|c142229_g1|c60400_g1|c107161_g1|c213088_g1|c55465_g1|c115645_g1|c215272_g1	http://www.genome.jp/kegg-bin/show_pathway?ko04930/K04371%09red/K00873%09red/K00844%09red
Morphine addiction	KEGG PATHWAY	ko05032	2	6	0.0982677	0.422103	c91507_g1|c111324_g2	http://www.genome.jp/kegg-bin/show_pathway?ko05032/K04536%09red/K15015%09red
MAPK signaling pathway	KEGG PATHWAY	ko04010	15	139	0.101629	0.422103	c140506_g1|c114107_g5|c100584_g1|c12257_g1|c107161_g1|c158786_g1|c213088_g1|c53849_g1|c178339_g1|c124873_g1|c55465_g1|c42624_g1|c2589_g1|c84214_g1|c94639_g1	http://www.genome.jp/kegg-bin/show_pathway?ko04010/K04460%09red/K04368%09red/K04392%09red/K04371%09red/K06268%09red/K03283%09red
Signaling pathways regulating pluripotency of stem cells	KEGG PATHWAY	ko04550	5	32	0.1034	0.422103	c107161_g1|c2120_g1|c213088_g1|c55465_g1|c100584_g1	http://www.genome.jp/kegg-bin/show_pathway?ko04550/K04371%09red/K04368%09red/K03083%09red
Prolactin signaling pathway	KEGG PATHWAY	ko04917	5	32	0.1034	0.422103	c107161_g1|c2120_g1|c213088_g1|c55465_g1|c100584_g1	http://www.genome.jp/kegg-bin/show_pathway?ko04917/K04371%09red/K04368%09red/K03083%09red
Bacterial invasion of epithelial cells	KEGG PATHWAY	ko05100	7	52	0.103973	0.422103	c30939_g1|c94639_g1|c212628_g1|c34038_g1|c124873_g1|c2589_g1|c84214_g1	http://www.genome.jp/kegg-bin/show_pathway?ko05100/K05758%09red/K05755%09red/K04392%09red/K05757%09red
Aldosterone-regulated sodium reabsorption	KEGG PATHWAY	ko04960	3	14	0.104391	0.422103	c107161_g1|c213088_g1|c55465_g1	http://www.genome.jp/kegg-bin/show_pathway?ko04960/K04371%09red
Nitrogen metabolism	KEGG PATHWAY	ko00910	8	63	0.107919	0.424077	c103964_g1|c159530_g1|c176928_g1|c97885_g1|c194990_g1|c40823_g1|c101927_g1|c85447_g1	http://www.genome.jp/kegg-bin/show_pathway?ko00910/K00262%09red/K00261%09red/K01674%09red/K15877%09red/K00264%09red/K01725%09red/K10534%09red/K01915%09red
Adherens junction	KEGG PATHWAY	ko04520	8	63	0.107919	0.424077	c94639_g1|c25840_g1|c107161_g1|c213088_g1|c124873_g1|c55465_g1|c2589_g1|c84214_g1	http://www.genome.jp/kegg-bin/show_pathway?ko04520/K04371%09red/K03097%09red/K04392%09red
Colorectal cancer	KEGG PATHWAY	ko05210	10	86	0.116632	0.443553	c94639_g1|c100584_g1|c216145_g1|c107161_g1|c213088_g1|c2120_g1|c124873_g1|c55465_g1|c2589_g1|c84214_g1	http://www.genome.jp/kegg-bin/show_pathway?ko05210/K04371%09red/K03083%09red/K04368%09red/K04392%09red/K08738%09red
Bladder cancer	KEGG PATHWAY	ko05219	4	24	0.118834	0.443553	c107161_g1|c213088_g1|c55465_g1|c100584_g1	http://www.genome.jp/kegg-bin/show_pathway?ko05219/K04371%09red/K04368%09red
Lysine biosynthesis	KEGG PATHWAY	ko00300	3	15	0.119235	0.443553	c213415_g1|c62461_g1|c74063_g1	http://www.genome.jp/kegg-bin/show_pathway?ko00300/K00928%09red/K12524%09red/K00133%09red
Taurine and hypotaurine metabolism	KEGG PATHWAY	ko00430	3	15	0.119235	0.443553	c212653_g1|c77648_g1|c106662_g1	http://www.genome.jp/kegg-bin/show_pathway?ko00430/K10712%09red/K01580%09red
Glycolysis / Gluconeogenesis	KEGG PATHWAY	ko00010	27	292	0.14105	0.517803	c195212_g1|c97638_g1|c82850_g1|c121925_g2|c195309_g1|c118169_g4|c118169_g6|c166504_g1|c158911_g1|c60400_g1|c121925_g1|c194676_g1|c215272_g1|c107038_g1|c124429_g1|c195236_g1|c126451_g1|c212924_g1|c125962_g1|c115645_g1|c118202_g2|c118202_g1|c142229_g1|c48335_g1|c122242_g1|c158888_g1|c115501_g1	http://www.genome.jp/kegg-bin/show_pathway?ko00010/K01568%09red/K00850%09red/K00844%09red/K00134%09red/K01803%09red/K00161%09red/K00927%09red/K00128%09red/K01623%09red/K01624%09red/K00162%09red/K00382%09red/K01810%09red/K01689%09red/K00873%09red/K00627%09red/K15633%09red/K00121%09red
Melanoma	KEGG PATHWAY	ko05218	4	27	0.156294	0.56631	c107161_g1|c213088_g1|c55465_g1|c100584_g1	http://www.genome.jp/kegg-bin/show_pathway?ko05218/K04371%09red/K04368%09red
Dorso-ventral axis formation	KEGG PATHWAY	ko04320	4	29	0.183388	0.649282	c107161_g1|c213088_g1|c55465_g1|c100584_g1	http://www.genome.jp/kegg-bin/show_pathway?ko04320/K04371%09red/K04368%09red
Endometrial cancer	KEGG PATHWAY	ko05213	5	40	0.188501	0.649282	c107161_g1|c2120_g1|c213088_g1|c55465_g1|c100584_g1	http://www.genome.jp/kegg-bin/show_pathway?ko05213/K04371%09red/K04368%09red/K03083%09red
Drug metabolism - other enzymes	KEGG PATHWAY	ko00983	5	40	0.188501	0.649282	c11975_g1|c1519_g1|c15351_g1|c123515_g1|c164447_g1	http://www.genome.jp/kegg-bin/show_pathway?ko00983/K13421%09red/K00088%09red/K00876%09red/K01951%09red
Hedgehog signaling pathway	KEGG PATHWAY	ko04340	5	40	0.188501	0.649282	c69749_g1|c2120_g1|c129177_g1|c140678_g1|c57206_g1	http://www.genome.jp/kegg-bin/show_pathway?ko04340/K02218%09red/K03083%09red
Glutathione metabolism	KEGG PATHWAY	ko00480	17	181	0.190887	0.649483	c120450_g4|c142639_g1|c30216_g2|c120196_g1|c15977_g1|c110739_g1|c119328_g1|c30058_g1|c57411_g1|c120026_g2|c49511_g1|c16998_g1|c120026_g1|c104674_g1|c120618_g2|c102036_g1|c45656_g1	http://www.genome.jp/kegg-bin/show_pathway?ko00480/K00797%09red/K01581%09red/K00799%09red/K00036%09red/K01920%09red/K00033%09red/K00434%09red/K00031%09red
Non-small cell lung cancer	KEGG PATHWAY	ko05223	4	30	0.197474	0.663797	c107161_g1|c213088_g1|c55465_g1|c100584_g1	http://www.genome.jp/kegg-bin/show_pathway?ko05223/K04371%09red/K04368%09red
Huntington's disease	KEGG PATHWAY	ko05016	30	347	0.208824	0.693592	c222220_g1|c217469_g1|c180427_g1|c216145_g1|c214752_g1|c163880_g1|c216806_g1|c140668_g1|c214467_g1|c141711_g1|c217506_g1|c199401_g1|c196032_g1|c159637_g1|c196431_g1|c141061_g1|c39479_g1|c214018_g1|c194844_g1|c194906_g1|c141511_g1|c141069_g1|c200826_g1|c178540_g1|c141011_g1|c183842_g1|c141527_g1|c1077_g1|c122420_g1|c179533_g1	http://www.genome.jp/kegg-bin/show_pathway?ko05016/K05863%09red/K03946%09red/K03120%09red/K02133%09red/K02132%09red/K02134%09red/K02137%09red/K02136%09red/K03963%09red/K03943%09red/K03942%09red/K03941%09red/K03940%09red/K08738%09red/K04564%09red/K04565%09red/K03014%09red/K11353%09red/K02265%09red/K02267%09red/K00417%09red/K00411%09red/K00413%09red/K03955%09red/K03953%09red/K00234%09red/K00235%09r…
Synaptic vesicle cycle	KEGG PATHWAY	ko04721	12	124	0.214067	0.698453	c141318_g1|c161297_g1|c12553_g1|c177122_g1|c144677_g1|c126931_g1|c123823_g1|c102096_g1|c95608_g1|c98446_g2|c176913_g1|c111324_g2	http://www.genome.jp/kegg-bin/show_pathway?ko04721/K02155%09red/K08486%09red/K15015%09red/K02145%09red/K02146%09red/K02147%09red/K02149%09red/K18211%09red/K15296%09red/K02151%09red/K02150%09red
Arginine and proline metabolism	KEGG PATHWAY	ko00330	16	173	0.215294	0.698453	c126447_g1|c30216_g2|c177443_g1|c166504_g1|c141948_g1|c128877_g1|c49511_g1|c97885_g1|c194990_g1|c1974_g1|c8502_g1|c143541_g1|c19711_g1|c159307_g1|c85447_g1|c125627_g1	http://www.genome.jp/kegg-bin/show_pathway?ko00330/K01755%09red/K00261%09red/K14455%09red/K14454%09red/K00262%09red/K00286%09red/K01940%09red/K00128%09red/K00811%09red/K00611%09red/K01581%09red/K01915%09red/K00797%09red/K01426%09red
Butirosin and neomycin biosynthesis	KEGG PATHWAY	ko00524	2	11	0.219677	0.70448	c142229_g1|c215272_g1	http://www.genome.jp/kegg-bin/show_pathway?ko00524/K00844%09red
Hepatitis C	KEGG PATHWAY	ko05160	7	66	0.226317	0.717528	c176930_g1|c125302_g1|c107161_g1|c213088_g1|c162401_g1|c2120_g1|c55465_g1	http://www.genome.jp/kegg-bin/show_pathway?ko05160/K04371%09red/K04382%09red/K03456%09red/K03083%09red/K03237%09red
Circadian rhythm - plant	KEGG PATHWAY	ko04712	10	104	0.246636	0.773164	c116865_g1|c113916_g1|c113916_g2|c113916_g3|c113690_g1|c116931_g1|c25840_g1|c104818_g1|c122026_g1|c111194_g1	http://www.genome.jp/kegg-bin/show_pathway?ko04712/K03097%09red/K12130%09red/K00660%09red
Fructose and mannose metabolism	KEGG PATHWAY	ko00051	12	129	0.250707	0.777192	c107038_g1|c118202_g1|c108275_g1|c125675_g1|c158888_g1|c118202_g2|c142229_g1|c97638_g1|c124429_g1|c115501_g1|c194853_g1|c215272_g1	http://www.genome.jp/kegg-bin/show_pathway?ko00051/K00966%09red/K00850%09red/K00844%09red/K01803%09red/K01623%09red/K01624%09red/K00847%09red/K17497%09red
Vascular smooth muscle contraction	KEGG PATHWAY	ko04270	7	69	0.257368	0.789074	c33508_g1|c100584_g1|c36301_g1|c107161_g1|c213088_g1|c55465_g1|c160930_g1	http://www.genome.jp/kegg-bin/show_pathway?ko04270/K04371%09red/K04368%09red/K06269%09red/K02183%09red
Phenylpropanoid biosynthesis	KEGG PATHWAY	ko00940	24	282	0.261642	0.793459	c115369_g3|c144845_g1|c119712_g1|c183656_g1|c120863_g3|c120863_g2|c114109_g1|c121946_g2|c118735_g1|c95400_g1|c115650_g1|c120335_g1|c102203_g1|c120528_g5|c120528_g2|c120528_g1|c144058_g1|c122012_g2|c118905_g1|c119312_g1|c118468_g3|c112704_g1|c115218_g2|c117424_g2	http://www.genome.jp/kegg-bin/show_pathway?ko00940/K10775%09red/K01188%09red/K00083%09red/K11188%09red/K00430%09red/K00487%09red
Amino sugar and nucleotide sugar metabolism	KEGG PATHWAY	ko00520	19	219	0.265776	0.797327	c195236_g1|c212727_g1|c108275_g1|c125675_g1|c52288_g1|c109106_g1|c142229_g1|c106864_g1|c113272_g1|c121014_g1|c103703_g1|c128368_g1|c79541_g1|c115713_g1|c194853_g1|c27973_g1|c165923_g1|c142520_g1|c215272_g1	http://www.genome.jp/kegg-bin/show_pathway?ko00520/K01183%09red/K00326%09red/K00844%09red/K00963%09red/K00966%09red/K01784%09red/K00820%09red/K01810%09red/K00847%09red/K00621%09red/K10046%09red/K00012%09red/K17497%09red
Acute myeloid leukemia	KEGG PATHWAY	ko05221	6	60	0.291033	0.849097	c45782_g1|c100584_g1|c96360_g1|c107161_g1|c213088_g1|c55465_g1	http://www.genome.jp/kegg-bin/show_pathway?ko05221/K04371%09red/K04368%09red/K04688%09red
Long-term potentiation	KEGG PATHWAY	ko04720	9	97	0.293505	0.849097	c33508_g1|c100584_g1|c36301_g1|c12257_g1|c107161_g1|c213088_g1|c178339_g1|c55465_g1|c160930_g1	http://www.genome.jp/kegg-bin/show_pathway?ko04720/K04371%09red/K04368%09red/K06269%09red/K06268%09red/K02183%09red
Vitamin B6 metabolism	KEGG PATHWAY	ko00750	3	25	0.295833	0.849097	c194859_g1|c30085_g1|c215131_g1	http://www.genome.jp/kegg-bin/show_pathway?ko00750/K00275%09red/K06215%09red/K00831%09red
Phosphonate and phosphinate metabolism	KEGG PATHWAY	ko00440	2	14	0.297233	0.849097	c57092_g1|c177427_g1	http://www.genome.jp/kegg-bin/show_pathway?ko00440/K00967%09red/K00993%09red
cAMP signaling pathway	KEGG PATHWAY	ko04024	13	148	0.300124	0.849097	c94639_g1|c33508_g1|c120918_g2|c120918_g3|c100584_g1|c36301_g1|c107161_g1|c213088_g1|c124873_g1|c55465_g1|c2589_g1|c84214_g1|c160930_g1	http://www.genome.jp/kegg-bin/show_pathway?ko04024/K01115%09red/K04368%09red/K04392%09red/K04371%09red/K06269%09red/K02183%09red
Sphingolipid metabolism	KEGG PATHWAY	ko00600	5	49	0.304336	0.849097	c98514_g1|c201697_g1|c104185_g1|c120818_g1|c100855_g1	http://www.genome.jp/kegg-bin/show_pathway?ko00600/K04713%09red/K00654%09red/K17108%09red
Circadian entrainment	KEGG PATHWAY	ko04713	5	49	0.304336	0.849097	c107161_g1|c91507_g1|c213088_g1|c36301_g1|c55465_g1	http://www.genome.jp/kegg-bin/show_pathway?ko04713/K04371%09red/K04536%09red/K02183%09red
Tropane, piperidine and pyridine alkaloid biosynthesis	KEGG PATHWAY	ko00960	4	38	0.318693	0.871719	c141948_g1|c177443_g1|c143541_g1|c125627_g1	http://www.genome.jp/kegg-bin/show_pathway?ko00960/K00811%09red/K14455%09red/K14454%09red
Chronic myeloid leukemia	KEGG PATHWAY	ko05220	4	38	0.318693	0.871719	c107161_g1|c213088_g1|c55465_g1|c100584_g1	http://www.genome.jp/kegg-bin/show_pathway?ko05220/K04371%09red/K04368%09red
Carbohydrate digestion and absorption	KEGG PATHWAY	ko04973	2	15	0.322945	0.874774	c142229_g1|c215272_g1	http://www.genome.jp/kegg-bin/show_pathway?ko04973/K00844%09red
Pyruvate metabolism	KEGG PATHWAY	ko00620	18	216	0.327111	0.877539	c118169_g4|c195212_g1|c118169_g6|c83344_g2|c213295_g1|c166504_g1|c177262_g1|c25055_g1|c159101_g1|c57650_g1|c60400_g1|c125962_g1|c212637_g1|c78798_g1|c194676_g1|c126451_g1|c57650_g2|c115645_g1	http://www.genome.jp/kegg-bin/show_pathway?ko00620/K01069%09red/K01958%09red/K01679%09red/K00161%09red/K00162%09red/K00128%09red/K01649%09red/K00029%09red/K00382%09red/K00873%09red/K00026%09red/K00627%09red/K00626%09red
Amoebiasis	KEGG PATHWAY	ko05146	3	27	0.333927	0.880252	c212841_g1|c52458_g1|c37771_g1	http://www.genome.jp/kegg-bin/show_pathway?ko05146/K07889%09red/K07897%09red
Linoleic acid metabolism	KEGG PATHWAY	ko00591	4	39	0.334433	0.880252	c121913_g1|c33526_g1|c118874_g1|c118874_g3	http://www.genome.jp/kegg-bin/show_pathway?ko00591/K14674%09red/K00454%09red/K15718%09red
Carbon fixation in photosynthetic organisms	KEGG PATHWAY	ko00710	17	205	0.340339	0.883822	c177262_g1|c34283_g1|c34343_g1|c143541_g1|c107038_g1|c97638_g1|c177443_g1|c93013_g3|c158888_g1|c57650_g1|c57650_g2|c48335_g1|c212873_g1|c195309_g1|c124429_g1|c78798_g1|c125627_g1	http://www.genome.jp/kegg-bin/show_pathway?ko00710/K00134%09red/K14455%09red/K14454%09red/K01100%09red/K00814%09red/K01803%09red/K00927%09red/K01623%09red/K01783%09red/K00615%09red/K00029%09red/K01624%09red/K00026%09red
ErbB signaling pathway	KEGG PATHWAY	ko04012	7	77	0.344943	0.883822	c45782_g1|c100584_g1|c96360_g1|c107161_g1|c213088_g1|c2120_g1|c55465_g1	http://www.genome.jp/kegg-bin/show_pathway?ko04012/K04371%09red/K04368%09red/K04688%09red/K03083%09red
Vasopressin-regulated water reabsorption	KEGG PATHWAY	ko04962	5	52	0.345293	0.883822	c57195_g1|c26178_g2|c52458_g1|c37771_g1|c2283_g1	http://www.genome.jp/kegg-bin/show_pathway?ko04962/K10418%09red/K07889%09red/K12462%09red/K07904%09red
GABAergic synapse	KEGG PATHWAY	ko04727	5	53	0.359036	0.909564	c194990_g1|c91507_g1|c162691_g1|c212653_g1|c111324_g2	http://www.genome.jp/kegg-bin/show_pathway?ko04727/K04536%09red/K01915%09red/K01580%09red/K08341%09red/K15015%09red
Toll-like receptor signaling pathway	KEGG PATHWAY	ko04620	10	117	0.36187	0.909564	c117458_g1|c121507_g1|c100584_g1|c107161_g1|c94639_g1|c213088_g1|c124873_g1|c55465_g1|c2589_g1|c84214_g1	http://www.genome.jp/kegg-bin/show_pathway?ko04620/K04371%09red/K04368%09red/K04733%09red/K04392%09red
Zeatin biosynthesis	KEGG PATHWAY	ko00908	3	29	0.371922	0.926484	c121709_g5|c116797_g1|c116797_g2	http://www.genome.jp/kegg-bin/show_pathway?ko00908/K13495%09red/K00279%09red
Neurotrophin signaling pathway	KEGG PATHWAY	ko04722	16	197	0.375782	0.927817	c117458_g1|c121507_g1|c81306_g2|c100584_g1|c36301_g1|c107161_g1|c94639_g1|c213088_g1|c2120_g1|c57195_g1|c124873_g1|c55465_g1|c81306_g5|c2589_g1|c84214_g1|c81306_g1	http://www.genome.jp/kegg-bin/show_pathway?ko04722/K04733%09red/K03083%09red/K04368%09red/K12462%09red/K04392%09red/K04371%09red/K06630%09red/K02183%09red
PI3K-Akt signaling pathway	KEGG PATHWAY	ko04151	26	331	0.385582	0.931848	c92787_g1|c114957_g2|c94783_g1|c158733_g1|c96360_g1|c217143_g1|c124873_g1|c81306_g5|c81306_g2|c84214_g1|c81306_g1|c79561_g1|c45782_g1|c213838_g1|c94639_g1|c213088_g1|c55465_g1|c91507_g1|c121210_g3|c125302_g1|c122363_g1|c100584_g1|c107161_g1|c162401_g1|c2120_g1|c2589_g1	http://www.genome.jp/kegg-bin/show_pathway?ko04151/K07208%09red/K04368%09red/K03258%09red/K04536%09red/K04382%09red/K03456%09red/K04688%09red/K03083%09red/K02991%09red/K07198%09red/K04392%09red/K03259%09red/K04079%09red/K04371%09red/K16339%09red/K06630%09red
D-Glutamine and D-glutamate metabolism	KEGG PATHWAY	ko00471	1	6	0.388938	0.931848	c97885_g1	http://www.genome.jp/kegg-bin/show_pathway?ko00471/K00261%09red
Biosynthesis of ansamycins	KEGG PATHWAY	ko01051	1	6	0.388938	0.931848	c34343_g1	http://www.genome.jp/kegg-bin/show_pathway?ko01051/K00615%09red
Nicotinate and nicotinamide metabolism	KEGG PATHWAY	ko00760	3	30	0.390775	0.931848	c32572_g1|c107970_g1|c107689_g1	http://www.genome.jp/kegg-bin/show_pathway?ko00760/K00278%09red/K00767%09red/K01950%09red
Synthesis and degradation of ketone bodies	KEGG PATHWAY	ko00072	2	18	0.398264	0.932062	c161230_g1|c159101_g1	http://www.genome.jp/kegg-bin/show_pathway?ko00072/K01641%09red/K00626%09red
Two-component system	KEGG PATHWAY	ko02020	5	56	0.400292	0.932062	c194990_g1|c159101_g1|c216145_g1|c180427_g1|c159637_g1	http://www.genome.jp/kegg-bin/show_pathway?ko02020/K08738%09red/K00411%09red/K01915%09red/K00626%09red/K00413%09red
Hippo signaling pathway	KEGG PATHWAY	ko04390	8	95	0.400887	0.932062	c81306_g5|c33508_g1|c125302_g1|c162401_g1|c2120_g1|c160930_g1|c81306_g2|c81306_g1	http://www.genome.jp/kegg-bin/show_pathway?ko04390/K04382%09red/K03456%09red/K06269%09red/K03083%09red/K06630%09red
Methane metabolism	KEGG PATHWAY	ko00680	12	149	0.413041	0.950809	c107038_g1|c118202_g1|c118202_g2|c97638_g1|c177007_g1|c158911_g1|c30473_g1|c30085_g1|c122242_g1|c158888_g1|c212924_g1|c115501_g1	http://www.genome.jp/kegg-bin/show_pathway?ko00680/K00850%09red/K01689%09red/K00058%09red/K00600%09red/K01623%09red/K01624%09red/K00831%09red/K00121%09red/K15633%09red
HIF-1 signaling pathway	KEGG PATHWAY	ko04066	14	176	0.416473	0.950809	c158733_g1|c45782_g1|c142229_g1|c114957_g2|c96360_g1|c100584_g1|c125962_g1|c107161_g1|c213088_g1|c48335_g1|c194676_g1|c55465_g1|c122242_g1|c215272_g1	http://www.genome.jp/kegg-bin/show_pathway?ko04066/K04368%09red/K00134%09red/K00844%09red/K01689%09red/K00161%09red/K00162%09red/K04688%09red/K02991%09red/K03259%09red/K04371%09red
Retinol metabolism	KEGG PATHWAY	ko00830	2	19	0.422523	0.950809	c50126_g1|c158911_g1	http://www.genome.jp/kegg-bin/show_pathway?ko00830/K07437%09red/K00121%09red
GnRH signaling pathway	KEGG PATHWAY	ko04912	7	84	0.424011	0.950809	c120918_g2|c120918_g3|c100584_g1|c36301_g1|c107161_g1|c213088_g1|c55465_g1	http://www.genome.jp/kegg-bin/show_pathway?ko04912/K04371%09red/K04368%09red/K01115%09red/K02183%09red
Steroid biosynthesis	KEGG PATHWAY	ko00100	6	71	0.42599	0.950809	c140570_g1|c86792_g1|c196412_g1|c198104_g1|c33526_g1|c117892_g1	http://www.genome.jp/kegg-bin/show_pathway?ko00100/K14424%09red/K07748%09red/K09832%09red/K14674%09red/K00559%09red/K00801%09red
Ascorbate and aldarate metabolism	KEGG PATHWAY	ko00053	7	85	0.435284	0.953957	c52288_g1|c166504_g1|c30058_g1|c103703_g1|c109106_g1|c16998_g1|c113165_g2	http://www.genome.jp/kegg-bin/show_pathway?ko00053/K00128%09red/K00423%09red/K10046%09red/K00012%09red/K00434%09red
cGMP-PKG signaling pathway	KEGG PATHWAY	ko04022	10	125	0.436028	0.953957	c33508_g1|c100584_g1|c36301_g1|c12257_g1|c107161_g1|c213088_g1|c194844_g1|c178339_g1|c55465_g1|c160930_g1	http://www.genome.jp/kegg-bin/show_pathway?ko04022/K05863%09red/K04368%09red/K04371%09red/K06269%09red/K06268%09red/K02183%09red
Cardiac muscle contraction	KEGG PATHWAY	ko04260	5	59	0.441242	0.953957	c214018_g1|c196431_g1|c199401_g1|c180427_g1|c159637_g1	http://www.genome.jp/kegg-bin/show_pathway?ko04260/K00417%09red/K02265%09red/K00411%09red/K02267%09red/K00413%09red
Thiamine metabolism	KEGG PATHWAY	ko00730	2	20	0.446264	0.953957	c122471_g1|c195569_g1	http://www.genome.jp/kegg-bin/show_pathway?ko00730/K14153%09red/K03146%09red
Thyroid hormone synthesis	KEGG PATHWAY	ko04918	3	33	0.446321	0.953957	c9827_g1|c196159_g1|c39008_g1	http://www.genome.jp/kegg-bin/show_pathway?ko04918/K08054%09red/K09490%09red
Systemic lupus erythematosus	KEGG PATHWAY	ko05322	9	113	0.44913	0.953957	c215864_g1|c58677_g1|c196911_g1|c212753_g1|c115076_g3|c213444_g1|c10747_g1|c29932_g1|c161673_g1	http://www.genome.jp/kegg-bin/show_pathway?ko05322/K11254%09red/K11251%09red/K11252%09red/K11253%09red/K11087%09red/K11086%09red/K11090%09red
Carbon fixation pathways in prokaryotes	KEGG PATHWAY	ko00720	8	100	0.45325	0.953957	c108947_g4|c83344_g2|c159101_g1|c122890_g1|c212637_g1|c33207_g1|c15977_g1|c214885_g1	http://www.genome.jp/kegg-bin/show_pathway?ko00720/K01958%09red/K01679%09red/K01681%09red/K01648%09red/K00626%09red/K00031%09red
Butanoate metabolism	KEGG PATHWAY	ko00650	5	60	0.454754	0.953957	c212653_g1|c161230_g1|c41475_g1|c11678_g1|c159101_g1	http://www.genome.jp/kegg-bin/show_pathway?ko00650/K01580%09red/K01652%09red/K01641%09red/K00626%09red/K17761%09red
Tryptophan metabolism	KEGG PATHWAY	ko00380	6	74	0.462648	0.956026	c166504_g1|c212952_g1|c212760_g1|c82988_g2|c159101_g1|c159307_g1	http://www.genome.jp/kegg-bin/show_pathway?ko00380/K03781%09red/K00164%09red/K00128%09red/K00816%09red/K01426%09red/K00626%09red
Betalain biosynthesis	KEGG PATHWAY	ko00965	1	8	0.469166	0.956026	c111945_g2	http://www.genome.jp/kegg-bin/show_pathway?ko00965/K15777%09red
Degradation of aromatic compounds	KEGG PATHWAY	ko01220	2	21	0.469446	0.956026	c119712_g1|c158911_g1	http://www.genome.jp/kegg-bin/show_pathway?ko01220/K00121%09red/K00487%09red
Type I diabetes mellitus	KEGG PATHWAY	ko04940	2	21	0.469446	0.956026	c212653_g1|c194773_g1	http://www.genome.jp/kegg-bin/show_pathway?ko04940/K04077%09red/K01580%09red
Cytosolic DNA-sensing pathway	KEGG PATHWAY	ko04623	3	35	0.482204	0.972152	c222220_g1|c162028_g1|c51444_g1	http://www.genome.jp/kegg-bin/show_pathway?ko04623/K03020%09red/K03014%09red/K03018%09red
RNA transport	KEGG PATHWAY	ko03013	28	376	0.484679	0.972152	c97952_g1|c114957_g2|c106804_g1|c94783_g1|c122231_g1|c160635_g1|c74383_g1|c112739_g2|c178489_g1|c122237_g1|c62371_g1|c213005_g1|c45157_g1|c122436_g1|c29297_g1|c178020_g1|c92812_g1|c67761_g1|c146063_g1|c176930_g1|c194662_g1|c159261_g1|c141800_g1|c214244_g1|c178517_g1|c141376_g1|c140520_g1|c197608_g1	http://www.genome.jp/kegg-bin/show_pathway?ko03013/K03754%09red/K03246%09red/K12160%09red/K03231%09red/K03242%09red/K03262%09red/K03260%09red/K03247%09red/K03248%09red/K12881%09red/K07936%09red/K03251%09red/K14004%09red/K03238%09red/K03113%09red/K12812%09red/K03259%09red/K03258%09red/K03257%09red/K03253%09red/K03252%09red/K03237%09red/K03236%09red/K13171%09red/K14298%09red/K14293%09red
C5-Branched dibasic acid metabolism	KEGG PATHWAY	ko00660	2	22	0.492036	0.972152	c216850_g1|c41475_g1	http://www.genome.jp/kegg-bin/show_pathway?ko00660/K01652%09red/K00052%09red
Glycine, serine and threonine metabolism	KEGG PATHWAY	ko00260	11	145	0.494177	0.972152	c213415_g1|c195212_g1|c177007_g1|c194803_g1|c30473_g1|c198428_g1|c30085_g1|c106890_g1|c62461_g1|c212924_g1|c74063_g1	http://www.genome.jp/kegg-bin/show_pathway?ko00260/K01754%09red/K00133%09red/K01697%09red/K01696%09red/K00600%09red/K12524%09red/K00382%09red/K00831%09red/K00928%09red/K00058%09red/K15633%09red
Viral carcinogenesis	KEGG PATHWAY	ko05203	22	297	0.502754	0.972152	c196911_g1|c98446_g2|c118169_g4|c118169_g6|c60400_g1|c163214_g1|c124873_g1|c81306_g5|c81306_g2|c84214_g1|c81306_g1|c180321_g1|c215864_g1|c39479_g1|c94639_g1|c213088_g1|c55465_g1|c29932_g1|c115645_g1|c107161_g1|c36608_g1|c2589_g1	http://www.genome.jp/kegg-bin/show_pathway?ko05203/K11254%09red/K03062%09red/K11252%09red/K03875%09red/K04392%09red/K02146%09red/K04371%09red/K00873%09red/K15306%09red/K06630%09red/K03120%09red
Fat digestion and absorption	KEGG PATHWAY	ko04975	1	9	0.50524	0.972152	c177443_g1	http://www.genome.jp/kegg-bin/show_pathway?ko04975/K14455%09red
Naphthalene degradation	KEGG PATHWAY	ko00626	1	9	0.50524	0.972152	c158911_g1	http://www.genome.jp/kegg-bin/show_pathway?ko00626/K00121%09red
Insulin secretion	KEGG PATHWAY	ko04911	1	9	0.50524	0.972152	c95608_g1	http://www.genome.jp/kegg-bin/show_pathway?ko04911/K18211%09red
Porphyrin and chlorophyll metabolism	KEGG PATHWAY	ko00860	6	78	0.5105	0.975545	c20053_g1|c109591_g1|c31456_g1|c105344_g4|c28699_g1|c142701_g1	http://www.genome.jp/kegg-bin/show_pathway?ko00860/K01749%09red/K01599%09red/K01764%09red/K01885%09red/K00228%09red
Streptomycin biosynthesis	KEGG PATHWAY	ko00521	2	23	0.514007	0.975564	c142229_g1|c215272_g1	http://www.genome.jp/kegg-bin/show_pathway?ko00521/K00844%09red
Amphetamine addiction	KEGG PATHWAY	ko05031	5	65	0.520691	0.981572	c33508_g1|c178339_g1|c12257_g1|c36301_g1|c160930_g1	http://www.genome.jp/kegg-bin/show_pathway?ko05031/K06269%09red/K06268%09red/K02183%09red
NOD-like receptor signaling pathway	KEGG PATHWAY	ko04621	4	52	0.533395	0.992917	c107161_g1|c213088_g1|c55465_g1|c122363_g1	http://www.genome.jp/kegg-bin/show_pathway?ko04621/K04371%09red/K04079%09red
Melanogenesis	KEGG PATHWAY	ko04916	6	80	0.533826	0.992917	c100584_g1|c36301_g1|c107161_g1|c213088_g1|c2120_g1|c55465_g1	http://www.genome.jp/kegg-bin/show_pathway?ko04916/K04371%09red/K04368%09red/K03083%09red/K02183%09red
Pancreatic secretion	KEGG PATHWAY	ko04972	5	67	0.546103	0.999999	c94639_g1|c124873_g1|c26178_g2|c2589_g1|c84214_g1	http://www.genome.jp/kegg-bin/show_pathway?ko04972/K04392%09red/K07904%09red
Tuberculosis	KEGG PATHWAY	ko05152	18	249	0.548561	0.999999	c144677_g1|c117458_g1|c61740_g1|c162946_g1|c121507_g1|c36301_g1|c212841_g1|c12257_g1|c216145_g1|c107161_g1|c177122_g1|c213088_g1|c194773_g1|c178339_g1|c55465_g1|c98446_g2|c37771_g1|c52458_g1	http://www.genome.jp/kegg-bin/show_pathway?ko05152/K04043%09red/K04733%09red/K08738%09red/K07889%09red/K02146%09red/K04371%09red/K04077%09red/K02155%09red/K02183%09red/K06268%09red/K07897%09red/K08066%09red
Brassinosteroid biosynthesis	KEGG PATHWAY	ko00905	2	25	0.556016	0.999999	c113670_g1|c116739_g1	http://www.genome.jp/kegg-bin/show_pathway?ko00905/K09589%09red/K15639%09red
Hepatitis B	KEGG PATHWAY	ko05161	6	82	0.55667	0.999999	c32070_g1|c100584_g1|c216145_g1|c107161_g1|c213088_g1|c55465_g1	http://www.genome.jp/kegg-bin/show_pathway?ko05161/K04371%09red/K04802%09red/K04368%09red/K08738%09red
Lysine degradation	KEGG PATHWAY	ko00310	5	69	0.570854	0.999999	c199089_g1|c159101_g1|c160769_g1|c166504_g1|c82988_g2	http://www.genome.jp/kegg-bin/show_pathway?ko00310/K00164%09red/K00128%09red/K00626%09red/K00658%09red
Insulin signaling pathway	KEGG PATHWAY	ko04910	22	310	0.579935	0.999999	c108764_g1|c92787_g1|c114957_g2|c87779_g1|c87221_g2|c160930_g1|c158733_g1|c96360_g1|c217143_g1|c213404_g1|c215272_g1|c33508_g1|c45782_g1|c213838_g1|c213088_g1|c55465_g1|c121210_g3|c142229_g1|c100584_g1|c36301_g1|c107161_g1|c2120_g1	http://www.genome.jp/kegg-bin/show_pathway?ko04910/K07208%09red/K04368%09red/K00844%09red/K07200%09red/K04688%09red/K03083%09red/K00688%09red/K02991%09red/K07198%09red/K03259%09red/K04371%09red/K06269%09red/K07192%09red/K02183%09red
Alcoholism	KEGG PATHWAY	ko05034	14	199	0.590318	0.999999	c91507_g1|c33508_g1|c215864_g1|c100584_g1|c36301_g1|c196911_g1|c107161_g1|c213088_g1|c115076_g3|c213444_g1|c55465_g1|c29932_g1|c10747_g1|c160930_g1	http://www.genome.jp/kegg-bin/show_pathway?ko05034/K11254%09red/K11251%09red/K11252%09red/K11253%09red/K04536%09red/K04368%09red/K04371%09red/K06269%09red/K02183%09red
Adrenergic signaling in cardiomyocytes	KEGG PATHWAY	ko04261	8	114	0.592976	0.999999	c33508_g1|c125302_g1|c36301_g1|c107161_g1|c213088_g1|c162401_g1|c55465_g1|c160930_g1	http://www.genome.jp/kegg-bin/show_pathway?ko04261/K04371%09red/K04382%09red/K03456%09red/K06269%09red/K02183%09red
Sulfur metabolism	KEGG PATHWAY	ko00920	5	71	0.594883	0.999999	c14971_g1|c46972_g2|c121124_g1|c177053_g1|c216145_g1	http://www.genome.jp/kegg-bin/show_pathway?ko00920/K00958%09red/K05907%09red/K17069%09red/K08738%09red/K01011%09red
Protein export	KEGG PATHWAY	ko03060	6	86	0.600706	0.999999	c143705_g1|c89815_g2|c196159_g1|c9827_g1|c9532_g1|c215190_g1	http://www.genome.jp/kegg-bin/show_pathway?ko03060/K03106%09red/K10956%09red/K09490%09red/K12948%09red/K07342%09red
mTOR signaling pathway	KEGG PATHWAY	ko04150	12	173	0.608142	0.999999	c158733_g1|c121210_g3|c45782_g1|c92787_g1|c114957_g2|c96360_g1|c217143_g1|c213838_g1|c94783_g1|c107161_g1|c213088_g1|c55465_g1	http://www.genome.jp/kegg-bin/show_pathway?ko04150/K07208%09red/K04688%09red/K02991%09red/K07198%09red/K03259%09red/K03258%09red/K04371%09red
Oxytocin signaling pathway	KEGG PATHWAY	ko04921	15	216	0.609836	0.999999	c121210_g3|c33508_g1|c12257_g1|c23272_g1|c92787_g1|c178146_g1|c100584_g1|c36301_g1|c213838_g1|c107161_g1|c213088_g1|c178339_g1|c55465_g1|c87221_g2|c160930_g1	http://www.genome.jp/kegg-bin/show_pathway?ko04921/K08794%09red/K07200%09red/K06268%09red/K04368%09red/K07198%09red/K04371%09red/K06269%09red/K03234%09red/K02183%09red
Ether lipid metabolism	KEGG PATHWAY	ko00565	4	58	0.61496	0.999999	c57092_g1|c33526_g1|c120918_g2|c120918_g3	http://www.genome.jp/kegg-bin/show_pathway?ko00565/K14674%09red/K00993%09red/K01115%09red
Basal cell carcinoma	KEGG PATHWAY	ko05217	1	13	0.626641	0.999999	c2120_g1	http://www.genome.jp/kegg-bin/show_pathway?ko05217/K03083%09red
Chloroalkane and chloroalkene degradation	KEGG PATHWAY	ko00625	2	29	0.632056	0.999999	c158911_g1|c166504_g1	http://www.genome.jp/kegg-bin/show_pathway?ko00625/K00128%09red/K00121%09red
Pantothenate and CoA biosynthesis	KEGG PATHWAY	ko00770	4	60	0.640087	0.999999	c148844_g1|c41475_g1|c9994_g1|c59068_g1	http://www.genome.jp/kegg-bin/show_pathway?ko00770/K01652%09red/K00826%09red/K00053%09red
FoxO signaling pathway	KEGG PATHWAY	ko04068	14	209	0.658821	0.999999	c121210_g3|c1785_g1|c58722_g1|c212760_g1|c100584_g1|c217506_g1|c213838_g1|c162691_g1|c107161_g1|c92787_g1|c213088_g1|c36608_g1|c55465_g1|c87221_g2	http://www.genome.jp/kegg-bin/show_pathway?ko04068/K03781%09red/K04564%09red/K05868%09red/K07200%09red/K03875%09red/K11434%09red/K08341%09red/K04368%09red/K07198%09red/K04371%09red
SNARE interactions in vesicular transport	KEGG PATHWAY	ko04130	3	47	0.669369	0.999999	c102096_g1|c159228_g1|c177181_g1	http://www.genome.jp/kegg-bin/show_pathway?ko04130/K08496%09red/K08486%09red/K08516%09red
Styrene degradation	KEGG PATHWAY	ko00643	1	15	0.675669	0.999999	c159307_g1	http://www.genome.jp/kegg-bin/show_pathway?ko00643/K01426%09red
Neuroactive ligand-receptor interaction	KEGG PATHWAY	ko04080	1	15	0.675669	0.999999	c180503_g1	http://www.genome.jp/kegg-bin/show_pathway?ko04080/K05770%09red
Legionellosis	KEGG PATHWAY	ko05134	12	183	0.679915	0.999999	c140764_g1|c213005_g1|c114107_g5|c48233_g1|c106672_g1|c215371_g1|c216145_g1|c140506_g1|c158786_g1|c194773_g1|c100519_g2|c195321_g1	http://www.genome.jp/kegg-bin/show_pathway?ko05134/K13525%09red/K03596%09red/K07953%09red/K08738%09red/K07874%09red/K07937%09red/K03231%09red/K04077%09red/K03233%09red/K03283%09red
Hippo signaling pathway - fly	KEGG PATHWAY	ko04391	5	79	0.68295	0.999999	c81306_g5|c81306_g2|c125302_g1|c162401_g1|c81306_g1	http://www.genome.jp/kegg-bin/show_pathway?ko04391/K04382%09red/K03456%09red/K06630%09red
Biosynthesis of unsaturated fatty acids	KEGG PATHWAY	ko01040	5	79	0.68295	0.999999	c22025_g1|c179906_g1|c42967_g1|c42373_g1|c120522_g1	http://www.genome.jp/kegg-bin/show_pathway?ko01040/K10256%09red/K03921%09red/K00507%09red/K10246%09red
TGF-beta signaling pathway	KEGG PATHWAY	ko04350	8	125	0.689112	0.999999	c125302_g1|c45782_g1|c96360_g1|c212644_g1|c107161_g1|c213088_g1|c162401_g1|c55465_g1	http://www.genome.jp/kegg-bin/show_pathway?ko04350/K04371%09red/K03094%09red/K04382%09red/K03456%09red/K04688%09red
Phototransduction	KEGG PATHWAY	ko04744	2	33	0.697522	0.999999	c91507_g1|c36301_g1	http://www.genome.jp/kegg-bin/show_pathway?ko04744/K04536%09red/K02183%09red
Proximal tubule bicarbonate reclamation	KEGG PATHWAY	ko04964	1	16	0.697715	0.999999	c97885_g1	http://www.genome.jp/kegg-bin/show_pathway?ko04964/K00261%09red
Folate biosynthesis	KEGG PATHWAY	ko00790	2	35	0.726464	0.999999	c115927_g1|c183792_g1	http://www.genome.jp/kegg-bin/show_pathway?ko00790/K01495%09red
Glioma	KEGG PATHWAY	ko05214	5	84	0.730969	0.999999	c107161_g1|c213088_g1|c36301_g1|c55465_g1|c100584_g1	http://www.genome.jp/kegg-bin/show_pathway?ko05214/K04371%09red/K04368%09red/K02183%09red
Arachidonic acid metabolism	KEGG PATHWAY	ko00590	2	36	0.740034	0.999999	c30479_g1|c33526_g1	http://www.genome.jp/kegg-bin/show_pathway?ko00590/K14674%09red/K15730%09red
Small cell lung cancer	KEGG PATHWAY	ko05222	2	36	0.740034	0.999999	c36608_g1|c216145_g1	http://www.genome.jp/kegg-bin/show_pathway?ko05222/K08738%09red/K03875%09red
alpha-Linolenic acid metabolism	KEGG PATHWAY	ko00592	5	86	0.74863	0.999999	c118516_g1|c119826_g1|c33526_g1|c118874_g1|c118874_g3	http://www.genome.jp/kegg-bin/show_pathway?ko00592/K14674%09red/K00454%09red/K05894%09red
Thyroid hormone signaling pathway	KEGG PATHWAY	ko04919	7	118	0.752862	0.999999	c100584_g1|c217143_g1|c160995_g1|c107161_g1|c213088_g1|c2120_g1|c55465_g1	http://www.genome.jp/kegg-bin/show_pathway?ko04919/K04371%09red/K05857%09red/K04368%09red/K07208%09red/K03083%09red
Dopaminergic synapse	KEGG PATHWAY	ko04728	7	118	0.752862	0.999999	c91507_g1|c33508_g1|c125302_g1|c36301_g1|c162401_g1|c2120_g1|c160930_g1	http://www.genome.jp/kegg-bin/show_pathway?ko04728/K04536%09red/K04382%09red/K03456%09red/K03083%09red/K06269%09red/K02183%09red
Inflammatory mediator regulation of TRP channels	KEGG PATHWAY	ko04750	3	54	0.753094	0.999999	c33508_g1|c36301_g1|c160930_g1	http://www.genome.jp/kegg-bin/show_pathway?ko04750/K06269%09red/K02183%09red
Benzoate degradation	KEGG PATHWAY	ko00362	1	19	0.755263	0.999999	c159101_g1	http://www.genome.jp/kegg-bin/show_pathway?ko00362/K00626%09red
Estrogen signaling pathway	KEGG PATHWAY	ko04915	10	166	0.763717	0.999999	c140506_g1|c161363_g1|c122363_g1|c114107_g5|c100584_g1|c36301_g1|c107161_g1|c158786_g1|c213088_g1|c55465_g1	http://www.genome.jp/kegg-bin/show_pathway?ko04915/K04368%09red/K09571%09red/K04079%09red/K04371%09red/K02183%09red/K03283%09red
Bacterial secretion system	KEGG PATHWAY	ko03070	1	20	0.7719	0.999999	c9532_g1	http://www.genome.jp/kegg-bin/show_pathway?ko03070/K03106%09red
Galactose metabolism	KEGG PATHWAY	ko00052	7	123	0.787567	0.999999	c128368_g1|c118202_g2|c118202_g1|c142229_g1|c27973_g1|c115501_g1|c215272_g1	http://www.genome.jp/kegg-bin/show_pathway?ko00052/K00963%09red/K00850%09red/K01784%09red/K00844%09red
Leishmaniasis	KEGG PATHWAY	ko05140	5	91	0.788977	0.999999	c107161_g1|c117458_g1|c213088_g1|c121507_g1|c55465_g1	http://www.genome.jp/kegg-bin/show_pathway?ko05140/K04371%09red/K04733%09red
Influenza A	KEGG PATHWAY	ko05164	14	235	0.803777	0.999999	c117458_g1|c176930_g1|c114107_g5|c160635_g1|c121507_g1|c100584_g1|c216145_g1|c107161_g1|c158786_g1|c213088_g1|c140506_g1|c2120_g1|c55465_g1|c122231_g1	http://www.genome.jp/kegg-bin/show_pathway?ko05164/K04733%09red/K08738%09red/K03083%09red/K04368%09red/K12812%09red/K14298%09red/K04371%09red/K03237%09red/K03283%09red
Wnt signaling pathway	KEGG PATHWAY	ko04310	9	158	0.807368	0.999999	c178339_g1|c212644_g1|c25840_g1|c94639_g1|c12257_g1|c2120_g1|c124873_g1|c2589_g1|c84214_g1	http://www.genome.jp/kegg-bin/show_pathway?ko04310/K03083%09red/K03094%09red/K03097%09red/K04392%09red/K06268%09red
Glyoxylate and dicarboxylate metabolism	KEGG PATHWAY	ko00630	10	174	0.808728	0.999999	c177262_g1|c212760_g1|c177172_g1|c177007_g1|c57650_g2|c57650_g1|c159101_g1|c194990_g1|c122890_g1|c214885_g1	http://www.genome.jp/kegg-bin/show_pathway?ko00630/K03781%09red/K01681%09red/K00626%09red/K00600%09red/K01915%09red/K00026%09red/K01647%09red
Circadian rhythm - fly	KEGG PATHWAY	ko04711	1	23	0.81533	0.999999	c2120_g1	http://www.genome.jp/kegg-bin/show_pathway?ko04711/K03083%09red
Hypertrophic cardiomyopathy (HCM)	KEGG PATHWAY	ko05410	4	78	0.81639	0.999999	c92787_g1|c87221_g2|c121210_g3|c213838_g1	http://www.genome.jp/kegg-bin/show_pathway?ko05410/K07200%09red/K07198%09red
Chagas disease (American trypanosomiasis)	KEGG PATHWAY	ko05142	7	128	0.818481	0.999999	c117458_g1|c125302_g1|c121507_g1|c107161_g1|c213088_g1|c162401_g1|c55465_g1	http://www.genome.jp/kegg-bin/show_pathway?ko05142/K04371%09red/K04733%09red/K03456%09red/K04382%09red
Tight junction	KEGG PATHWAY	ko04530	3	63	0.834678	0.999999	c25840_g1|c125302_g1|c162401_g1	http://www.genome.jp/kegg-bin/show_pathway?ko04530/K04382%09red/K03456%09red/K03097%09red
Pathways in cancer	KEGG PATHWAY	ko05200	13	227	0.836417	0.999999	c94639_g1|c122363_g1|c100584_g1|c216145_g1|c107161_g1|c213088_g1|c212637_g1|c2120_g1|c36608_g1|c124873_g1|c55465_g1|c2589_g1|c84214_g1	http://www.genome.jp/kegg-bin/show_pathway?ko05200/K01679%09red/K08738%09red/K03875%09red/K03083%09red/K04368%09red/K04392%09red/K04079%09red/K04371%09red
Valine, leucine and isoleucine degradation	KEGG PATHWAY	ko00280	6	116	0.84365	0.999999	c59068_g1|c195212_g1|c166504_g1|c159101_g1|c148844_g1|c161230_g1	http://www.genome.jp/kegg-bin/show_pathway?ko00280/K00128%09red/K00826%09red/K01641%09red/K00626%09red/K00382%09red
Pertussis	KEGG PATHWAY	ko05133	7	133	0.845772	0.999999	c117458_g1|c121507_g1|c122909_g1|c36301_g1|c107161_g1|c213088_g1|c55465_g1	http://www.genome.jp/kegg-bin/show_pathway?ko05133/K04371%09red/K05765%09red/K04733%09red/K02183%09red
Carotenoid biosynthesis	KEGG PATHWAY	ko00906	2	46	0.846587	0.999999	c141692_g1|c107698_g1	http://www.genome.jp/kegg-bin/show_pathway?ko00906/K09840%09red/K09841%09red
Sulfur relay system	KEGG PATHWAY	ko04122	1	26	0.850494	0.999999	c14971_g1	http://www.genome.jp/kegg-bin/show_pathway?ko04122/K01011%09red
Riboflavin metabolism	KEGG PATHWAY	ko00740	1	26	0.850494	0.999999	c111492_g2	http://www.genome.jp/kegg-bin/show_pathway?ko00740/K14379%09red
Regulation of autophagy	KEGG PATHWAY	ko04140	5	102	0.859809	0.999999	c92787_g1|c121210_g3|c213838_g1|c117646_g1|c162691_g1	http://www.genome.jp/kegg-bin/show_pathway?ko04140/K08341%09red/K08332%09red/K07198%09red
Apoptosis	KEGG PATHWAY	ko04210	5	102	0.859809	0.999999	c117458_g1|c178339_g1|c12257_g1|c121507_g1|c216145_g1	http://www.genome.jp/kegg-bin/show_pathway?ko04210/K04733%09red/K06268%09red/K08738%09red
Oocyte meiosis	KEGG PATHWAY	ko04114	15	265	0.861383	0.999999	c81306_g5|c33508_g1|c125302_g1|c12257_g1|c100584_g1|c36301_g1|c212644_g1|c107161_g1|c213088_g1|c162401_g1|c178339_g1|c55465_g1|c81306_g1|c81306_g2|c160930_g1	http://www.genome.jp/kegg-bin/show_pathway?ko04114/K03094%09red/K04382%09red/K03456%09red/K04368%09red/K04371%09red/K06269%09red/K06268%09red/K06630%09red/K02183%09red
Aminobenzoate degradation	KEGG PATHWAY	ko00627	3	67	0.86276	0.999999	c120279_g1|c159307_g1|c120408_g1	http://www.genome.jp/kegg-bin/show_pathway?ko00627/K01426%09red/K00517%09red
Calcium signaling pathway	KEGG PATHWAY	ko04020	5	103	0.86513	0.999999	c178339_g1|c12257_g1|c36301_g1|c160995_g1|c194844_g1	http://www.genome.jp/kegg-bin/show_pathway?ko04020/K05857%09red/K05863%09red/K06268%09red/K02183%09red
Epstein-Barr virus infection	KEGG PATHWAY	ko05169	24	407	0.869072	0.999999	c222220_g1|c125969_g1|c114107_g5|c162028_g1|c140586_g1|c112551_g2|c140506_g1|c166343_g1|c81306_g5|c81306_g2|c81306_g1|c159206_g1|c180321_g1|c67761_g1|c39479_g1|c25840_g1|c158786_g1|c27484_g1|c51444_g1|c140804_g1|c15989_g2|c213355_g1|c36608_g1|c2120_g1	http://www.genome.jp/kegg-bin/show_pathway?ko05169/K03064%09red/K03065%09red/K03062%09red/K03063%09red/K03097%09red/K03083%09red/K03875%09red/K03018%09red/K03020%09red/K03014%09red/K07936%09red/K03120%09red/K03039%09red/K03037%09red/K03035%09red/K03030%09red/K03033%09red/K03032%09red/K06630%09red/K03283%09red
Terpenoid backbone biosynthesis	KEGG PATHWAY	ko00900	4	87	0.873645	0.999999	c58109_g1|c161230_g1|c109362_g1|c159101_g1	http://www.genome.jp/kegg-bin/show_pathway?ko00900/K05356%09red/K01641%09red/K01823%09red/K00626%09red
Mineral absorption	KEGG PATHWAY	ko04978	1	29	0.878964	0.999999	c32997_g1	http://www.genome.jp/kegg-bin/show_pathway?ko04978/K07213%09red
Glycerophospholipid metabolism	KEGG PATHWAY	ko00564	9	174	0.880663	0.999999	c57092_g1|c177427_g1|c120918_g2|c89796_g1|c120918_g3|c125098_g1|c82663_g1|c33526_g1|c195637_g1	http://www.genome.jp/kegg-bin/show_pathway?ko00564/K00967%09red/K05929%09red/K00894%09red/K00993%09red/K01115%09red/K08744%09red/K14674%09red/K00981%09red
Propanoate metabolism	KEGG PATHWAY	ko00640	4	90	0.888958	0.999999	c158835_g1|c159814_g1|c178183_g1|c159101_g1	http://www.genome.jp/kegg-bin/show_pathway?ko00640/K01900%09red/K00626%09red/K01899%09red/K01720%09red
Spliceosome	KEGG PATHWAY	ko03040	26	446	0.889496	0.999999	c11004_g1|c114107_g5|c106804_g1|c160635_g1|c212753_g1|c123615_g1|c161673_g1|c15365_g1|c6853_g1|c181159_g1|c62385_g1|c140506_g1|c159191_g1|c186824_g1|c158786_g1|c32268_g1|c121649_g2|c28781_g1|c81058_g1|c177998_g1|c214617_g1|c123426_g1|c140766_g1|c61911_g1|c74383_g1|c149831_g1	http://www.genome.jp/kegg-bin/show_pathway?ko03040/K12845%09red/K12741%09red/K11093%09red/K11097%09red/K12836%09red/K11098%09red/K12823%09red/K12833%09red/K11096%09red/K12881%09red/K12622%09red/K11086%09red/K12624%09red/K12812%09red/K12626%09red/K09564%09red/K12897%09red/K12813%09red/K11099%09red/K11087%09red/K03283%09red
Prostate cancer	KEGG PATHWAY	ko05215	6	126	0.891251	0.999999	c122363_g1|c100584_g1|c107161_g1|c213088_g1|c2120_g1|c55465_g1	http://www.genome.jp/kegg-bin/show_pathway?ko05215/K04371%09red/K04368%09red/K03083%09red/K04079%09red
Progesterone-mediated oocyte maturation	KEGG PATHWAY	ko04914	6	126	0.891251	0.999999	c122363_g1|c100584_g1|c58722_g1|c107161_g1|c213088_g1|c55465_g1	http://www.genome.jp/kegg-bin/show_pathway?ko04914/K04371%09red/K04368%09red/K05868%09red/K04079%09red
PPAR signaling pathway	KEGG PATHWAY	ko03320	3	72	0.8919	0.999999	c195568_g1|c42373_g1|c32596_g1	http://www.genome.jp/kegg-bin/show_pathway?ko03320/K01897%09red/K08762%09red/K00507%09red
Herpes simplex infection	KEGG PATHWAY	ko05168	10	196	0.899257	0.999999	c176930_g1|c33508_g1|c212644_g1|c106804_g1|c39479_g1|c25840_g1|c216145_g1|c74383_g1|c36608_g1|c160930_g1	http://www.genome.jp/kegg-bin/show_pathway?ko05168/K03094%09red/K03097%09red/K08738%09red/K03875%09red/K12881%09red/K03120%09red/K06269%09red/K03237%09red
Other glycan degradation	KEGG PATHWAY	ko00511	1	33	0.908678	0.999999	c120818_g1	http://www.genome.jp/kegg-bin/show_pathway?ko00511/K17108%09red
Salivary secretion	KEGG PATHWAY	ko04970	1	34	0.914888	0.999999	c36301_g1	http://www.genome.jp/kegg-bin/show_pathway?ko04970/K02183%09red
Fatty acid degradation	KEGG PATHWAY	ko00071	4	97	0.918515	0.999999	c158911_g1|c32596_g1|c166504_g1|c159101_g1	http://www.genome.jp/kegg-bin/show_pathway?ko00071/K00128%09red/K00121%09red/K00626%09red/K01897%09red
Sesquiterpenoid and triterpenoid biosynthesis	KEGG PATHWAY	ko00909	1	35	0.920677	0.999999	c198104_g1	http://www.genome.jp/kegg-bin/show_pathway?ko00909/K00801%09red
Olfactory transduction	KEGG PATHWAY	ko04740	1	36	0.926071	0.999999	c36301_g1	http://www.genome.jp/kegg-bin/show_pathway?ko04740/K02183%09red
Phototransduction - fly	KEGG PATHWAY	ko04745	1	36	0.926071	0.999999	c36301_g1	http://www.genome.jp/kegg-bin/show_pathway?ko04745/K02183%09red
Gastric acid secretion	KEGG PATHWAY	ko04971	1	36	0.926071	0.999999	c36301_g1	http://www.genome.jp/kegg-bin/show_pathway?ko04971/K02183%09red
Limonene and pinene degradation	KEGG PATHWAY	ko00903	3	80	0.927111	0.999999	c120279_g1|c120408_g1|c166504_g1	http://www.genome.jp/kegg-bin/show_pathway?ko00903/K00128%09red/K00517%09red
Stilbenoid, diarylheptanoid and gingerol biosynthesis	KEGG PATHWAY	ko00945	3	81	0.930682	0.999999	c120279_g1|c120408_g1|c119712_g1	http://www.genome.jp/kegg-bin/show_pathway?ko00945/K00487%09red/K00517%09red
Biotin metabolism	KEGG PATHWAY	ko00780	1	37	0.931099	0.999999	c163117_g1	http://www.genome.jp/kegg-bin/show_pathway?ko00780/K01012%09red
Adipocytokine signaling pathway	KEGG PATHWAY	ko04920	6	138	0.931546	0.999999	c121210_g3|c107258_g1|c92787_g1|c213838_g1|c87221_g2|c32596_g1	http://www.genome.jp/kegg-bin/show_pathway?ko04920/K07297%09red/K01897%09red/K07200%09red/K07198%09red
Polycyclic aromatic hydrocarbon degradation	KEGG PATHWAY	ko00624	2	61	0.93371	0.999999	c120279_g1|c120408_g1	http://www.genome.jp/kegg-bin/show_pathway?ko00624/K00517%09red
Bisphenol degradation	KEGG PATHWAY	ko00363	2	62	0.937414	0.999999	c120279_g1|c120408_g1	http://www.genome.jp/kegg-bin/show_pathway?ko00363/K00517%09red
Fatty acid elongation	KEGG PATHWAY	ko00062	2	64	0.944242	0.999999	c22025_g1|c116169_g2	http://www.genome.jp/kegg-bin/show_pathway?ko00062/K10246%09red/K15397%09red
Pentose and glucuronate interconversions	KEGG PATHWAY	ko00040	6	144	0.946232	0.999999	c118827_g1|c34283_g1|c166504_g1|c52288_g1|c27973_g1|c109106_g1	http://www.genome.jp/kegg-bin/show_pathway?ko00040/K00128%09red/K00012%09red/K01783%09red/K01184%09red/K00963%09red
AMPK signaling pathway	KEGG PATHWAY	ko04152	16	317	0.946603	0.999999	c118202_g2|c118202_g1|c121210_g3|c42373_g1|c125302_g1|c23272_g1|c92787_g1|c45782_g1|c96360_g1|c217143_g1|c213838_g1|c162401_g1|c87221_g2|c115501_g1|c213293_g1|c107258_g1	http://www.genome.jp/kegg-bin/show_pathway?ko04152/K07208%09red/K00850%09red/K07200%09red/K04382%09red/K03456%09red/K04688%09red/K03234%09red/K07877%09red/K07198%09red/K07297%09red/K00507%09red
p53 signaling pathway	KEGG PATHWAY	ko04115	2	65	0.947384	0.999999	c216145_g1|c58722_g1	http://www.genome.jp/kegg-bin/show_pathway?ko04115/K08738%09red/K05868%09red
Measles	KEGG PATHWAY	ko05162	10	220	0.954195	0.999999	c140506_g1|c176930_g1|c114107_g5|c121507_g1|c25840_g1|c212768_g1|c158786_g1|c178517_g1|c2120_g1|c117458_g1	http://www.genome.jp/kegg-bin/show_pathway?ko05162/K03097%09red/K03083%09red/K03247%09red/K14753%09red/K04733%09red/K03237%09red/K03283%09red
HTLV-I infection	KEGG PATHWAY	ko05166	11	238	0.955068	0.999999	c32070_g1|c180503_g1|c67761_g1|c39479_g1|c39008_g1|c12257_g1|c85324_g1|c194844_g1|c163214_g1|c178339_g1|c2120_g1	http://www.genome.jp/kegg-bin/show_pathway?ko05166/K08054%09red/K02180%09red/K03083%09red/K05863%09red/K04802%09red/K07936%09red/K03120%09red/K15306%09red/K06268%09red/K05770%09red
Toxoplasmosis	KEGG PATHWAY	ko05145	10	221	0.955755	0.999999	c117458_g1|c114107_g5|c121507_g1|c216145_g1|c107161_g1|c158786_g1|c213088_g1|c111795_g1|c140506_g1|c55465_g1	http://www.genome.jp/kegg-bin/show_pathway?ko05145/K04371%09red/K04733%09red/K08738%09red/K13412%09red/K03283%09red
Histidine metabolism	KEGG PATHWAY	ko00340	1	44	0.95792	0.999999	c166504_g1	http://www.genome.jp/kegg-bin/show_pathway?ko00340/K00128%09red
Transcriptional misregulation in cancer	KEGG PATHWAY	ko05202	3	91	0.958488	0.999999	c121649_g2|c115076_g3|c62385_g1	http://www.genome.jp/kegg-bin/show_pathway?ko05202/K12823%09red/K11253%09red
Fatty acid metabolism	KEGG PATHWAY	ko01212	7	169	0.958691	0.999999	c22025_g1|c42373_g1|c120522_g1|c42967_g1|c159101_g1|c179906_g1|c32596_g1	http://www.genome.jp/kegg-bin/show_pathway?ko01212/K00626%09red/K10246%09red/K01897%09red/K10256%09red/K03921%09red/K00507%09red
beta-Alanine metabolism	KEGG PATHWAY	ko00410	3	92	0.960601	0.999999	c212653_g1|c49511_g1|c166504_g1	http://www.genome.jp/kegg-bin/show_pathway?ko00410/K00128%09red/K00797%09red/K01580%09red
Ubiquitin mediated proteolysis	KEGG PATHWAY	ko04120	12	267	0.969531	0.999999	c15223_g1|c161259_g1|c1199_g1|c212644_g1|c141609_g1|c159789_g1|c15579_g1|c73883_g1|c36608_g1|c212640_g1|c194641_g1|c122736_g1	http://www.genome.jp/kegg-bin/show_pathway?ko04120/K10580%09red/K06689%09red/K06688%09red/K10576%09red/K03094%09red/K10575%09red/K10573%09red/K03875%09red/K10688%09red/K04649%09red/K10579%09red
Circadian rhythm	KEGG PATHWAY	ko04710	5	141	0.973342	0.999999	c92787_g1|c87221_g2|c121210_g3|c212644_g1|c213838_g1	http://www.genome.jp/kegg-bin/show_pathway?ko04710/K07200%09red/K03094%09red/K07198%09red
RNA polymerase	KEGG PATHWAY	ko03020	3	100	0.974207	0.999999	c222220_g1|c162028_g1|c51444_g1	http://www.genome.jp/kegg-bin/show_pathway?ko03020/K03020%09red/K03014%09red/K03018%09red
Phosphatidylinositol signaling system	KEGG PATHWAY	ko04070	4	123	0.976237	0.999999	c160995_g1|c36301_g1|c66041_g1|c82663_g1	http://www.genome.jp/kegg-bin/show_pathway?ko04070/K05857%09red/K00888%09red/K00981%09red/K02183%09red
Peroxisome	KEGG PATHWAY	ko04146	7	185	0.978512	0.999999	c212760_g1|c217506_g1|c15977_g1|c122936_g1|c115125_g1|c141069_g1|c32596_g1	http://www.genome.jp/kegg-bin/show_pathway?ko04146/K03781%09red/K12261%09red/K04564%09red/K04565%09red/K13237%09red/K01897%09red/K00031%09red
Diterpenoid biosynthesis	KEGG PATHWAY	ko00904	1	54	0.9792	0.999999	c105826_g1	http://www.genome.jp/kegg-bin/show_pathway?ko00904/K04125%09red
Inositol phosphate metabolism	KEGG PATHWAY	ko00562	3	105	0.980301	0.999999	c160995_g1|c66041_g1|c124429_g1	http://www.genome.jp/kegg-bin/show_pathway?ko00562/K05857%09red/K01803%09red/K00888%09red
One carbon pool by folate	KEGG PATHWAY	ko00670	1	55	0.980615	0.999999	c177007_g1	http://www.genome.jp/kegg-bin/show_pathway?ko00670/K00600%09red
NF-kappa B signaling pathway	KEGG PATHWAY	ko04064	3	107	0.982331	0.999999	c117458_g1|c121507_g1|c25840_g1	http://www.genome.jp/kegg-bin/show_pathway?ko04064/K04733%09red/K03097%09red
Plant-pathogen interaction	KEGG PATHWAY	ko04626	14	322	0.984373	0.999999	c117862_g1|c96521_g1|c140736_g1|c122363_g1|c82849_g1|c100584_g1|c113118_g1|c36301_g1|c117084_g1|c98568_g1|c76312_g1|c98220_g2|c111795_g1|c9705_g1	http://www.genome.jp/kegg-bin/show_pathway?ko04626/K13458%09red/K13412%09red/K04079%09red/K02358%09red/K04368%09red/K13449%09red/K13448%09red/K13447%09red/K13424%09red/K02183%09red
Endocytosis	KEGG PATHWAY	ko04144	14	322	0.984373	0.999999	c140764_g1|c213177_g1|c120918_g2|c120918_g3|c114107_g5|c80869_g2|c212841_g1|c140506_g1|c158786_g1|c159254_g1|c52458_g1|c143676_g1|c26178_g2|c37771_g1	http://www.genome.jp/kegg-bin/show_pathway?ko04144/K12191%09red/K12189%09red/K01115%09red/K07889%09red/K07937%09red/K12493%09red/K12486%09red/K07904%09red/K07897%09red/K03283%09red
Ubiquinone and other terpenoid-quinone biosynthesis	KEGG PATHWAY	ko00130	1	60	0.986373	0.999999	c119712_g1	http://www.genome.jp/kegg-bin/show_pathway?ko00130/K00487%09red
Antigen processing and presentation	KEGG PATHWAY	ko04612	7	196	0.986562	0.999999	c61740_g1|c122363_g1|c114107_g5|c39008_g1|c40401_g1|c140506_g1|c158786_g1	http://www.genome.jp/kegg-bin/show_pathway?ko04612/K04079%09red/K08054%09red/K03283%09red/K09489%09red/K08066%09red
Endocrine and other factor-regulated calcium reabsorption	KEGG PATHWAY	ko04961	1	62	0.988164	0.999999	c26178_g2	http://www.genome.jp/kegg-bin/show_pathway?ko04961/K07904%09red
Fatty acid biosynthesis	KEGG PATHWAY	ko00061	2	90	0.988171	0.999999	c120522_g1|c32596_g1	http://www.genome.jp/kegg-bin/show_pathway?ko00061/K01897%09red/K03921%09red
Plant hormone signal transduction	KEGG PATHWAY	ko04075	15	349	0.988578	0.999999	c107454_g1|c118190_g1|c94122_g1|c101701_g1|c82849_g1|c111118_g1|c110457_g1|c121293_g2|c120728_g1|c106849_g1|c101954_g1|c104621_g1|c117107_g1|c141617_g1|c104756_g1	http://www.genome.jp/kegg-bin/show_pathway?ko04075/K14486%09red/K14487%09red/K14484%09red/K14504%09red/K14502%09red/K13449%09red/K14512%09red/K14516%09red
Cyanoamino acid metabolism	KEGG PATHWAY	ko00460	3	116	0.989235	0.999999	c177007_g1|c31491_g1|c122012_g2	http://www.genome.jp/kegg-bin/show_pathway?ko00460/K01188%09red/K13035%09red/K00600%09red
mRNA surveillance pathway	KEGG PATHWAY	ko03015	10	264	0.991134	0.999999	c33508_g1|c125302_g1|c80557_g2|c106804_g1|c62055_g1|c160635_g1|c74383_g1|c162401_g1|c178489_g1|c160930_g1	http://www.genome.jp/kegg-bin/show_pathway?ko03015/K03267%09red/K13171%09red/K03456%09red/K12881%09red/K03265%09red/K12812%09red/K06269%09red/K04382%09red
Meiosis - yeast	KEGG PATHWAY	ko04113	5	166	0.9919	0.999999	c160930_g1|c33508_g1|c125302_g1|c162401_g1|c91901_g1	http://www.genome.jp/kegg-bin/show_pathway?ko04113/K12761%09red/K04382%09red/K03456%09red/K06269%09red
Protein processing in endoplasmic reticulum	KEGG PATHWAY	ko04141	23	502	0.99244	0.999999	c114107_g5|c89394_g1|c212640_g1|c146063_g1|c39008_g1|c140506_g1|c196159_g1|c9827_g1|c176930_g1|c215190_g1|c194641_g1|c67415_g1|c159536_g1|c106672_g1|c212644_g1|c158786_g1|c197111_g1|c143705_g1|c15223_g1|c140939_g1|c122363_g1|c215371_g1|c30604_g1	http://www.genome.jp/kegg-bin/show_pathway?ko04141/K08054%09red/K13525%09red/K07953%09red/K09503%09red/K06689%09red/K03094%09red/K10956%09red/K10575%09red/K10950%09red/K10839%09red/K07342%09red/K09490%09red/K14004%09red/K04079%09red/K14012%09red/K14006%09red/K09580%09red/K03237%09red/K03283%09red
Starch and sucrose metabolism	KEGG PATHWAY	ko00500	15	365	0.993462	0.999999	c118827_g1|c27973_g1|c162088_g1|c52288_g1|c109106_g1|c142229_g1|c117909_g1|c116402_g1|c87779_g1|c195236_g1|c73043_g1|c108275_g1|c120516_g2|c122012_g2|c215272_g1	http://www.genome.jp/kegg-bin/show_pathway?ko00500/K00847%09red/K01184%09red/K00844%09red/K00700%09red/K01188%09red/K16055%09red/K00963%09red/K00688%09red/K01810%09red/K00012%09red/K00695%09red
Pyrimidine metabolism	KEGG PATHWAY	ko00240	10	274	0.994077	0.999999	c222220_g1|c15351_g1|c123515_g1|c11975_g1|c196548_g1|c122424_g1|c196138_g1|c212986_g1|c162028_g1|c51444_g1	http://www.genome.jp/kegg-bin/show_pathway?ko00240/K00384%09red/K01956%09red/K03020%09red/K03014%09red/K13421%09red/K00940%09red/K01937%09red/K00876%09red/K03018%09red
Basal transcription factors	KEGG PATHWAY	ko03022	1	77	0.995889	0.999999	c39479_g1	http://www.genome.jp/kegg-bin/show_pathway?ko03022/K03120%09red
Mismatch repair	KEGG PATHWAY	ko03430	2	108	0.996111	0.999999	c32070_g1|c53451_g1	http://www.genome.jp/kegg-bin/show_pathway?ko03430/K04802%09red/K07466%09red
Nucleotide excision repair	KEGG PATHWAY	ko03420	3	141	0.997401	0.999999	c32070_g1|c53451_g1|c159536_g1	http://www.genome.jp/kegg-bin/show_pathway?ko03420/K04802%09red/K07466%09red/K10839%09red
Glycerolipid metabolism	KEGG PATHWAY	ko00561	2	117	0.997789	0.999999	c33526_g1|c166504_g1	http://www.genome.jp/kegg-bin/show_pathway?ko00561/K00128%09red/K14674%09red
N-Glycan biosynthesis	KEGG PATHWAY	ko00510	1	88	0.998108	0.999999	c159686_g1	http://www.genome.jp/kegg-bin/show_pathway?ko00510/K00721%09red
Base excision repair	KEGG PATHWAY	ko03410	1	88	0.998108	0.999999	c32070_g1	http://www.genome.jp/kegg-bin/show_pathway?ko03410/K04802%09red
Lysosome	KEGG PATHWAY	ko04142	4	179	0.998766	0.999999	c177122_g1|c98446_g2|c97072_g1|c144677_g1	http://www.genome.jp/kegg-bin/show_pathway?ko04142/K12394%09red/K02155%09red/K02146%09red
Homologous recombination	KEGG PATHWAY	ko03440	1	96	0.998924	0.999999	c53451_g1	http://www.genome.jp/kegg-bin/show_pathway?ko03440/K07466%09red
Cell cycle	KEGG PATHWAY	ko04110	10	318	0.999099	0.999999	c32070_g1|c58722_g1|c212644_g1|c177187_g1|c85324_g1|c36608_g1|c2120_g1|c81306_g5|c81306_g2|c81306_g1	http://www.genome.jp/kegg-bin/show_pathway?ko04110/K05868%09red/K08866%09red/K03094%09red/K03083%09red/K03875%09red/K04802%09red/K02180%09red/K06630%09red
DNA replication	KEGG PATHWAY	ko03030	2	132	0.999147	0.999999	c32070_g1|c53451_g1	http://www.genome.jp/kegg-bin/show_pathway?ko03030/K04802%09red/K07466%09red
Ribosome biogenesis in eukaryotes	KEGG PATHWAY	ko03008	11	365	0.999723	0.999999	c197456_g1|c46276_g1|c195728_g1|c158742_g1|c25840_g1|c214635_g1|c67761_g1|c164359_g1|c148618_g1|c140766_g1|c141733_g1	http://www.genome.jp/kegg-bin/show_pathway?ko03008/K14563%09red/K14564%09red/K14569%09red/K03097%09red/K03264%09red/K11128%09red/K11129%09red/K07936%09red/K12845%09red/K11131%09red/K11130%09red
Fanconi anemia pathway	KEGG PATHWAY	ko03460	1	118	0.999772	0.999999	c53451_g1	http://www.genome.jp/kegg-bin/show_pathway?ko03460/K07466%09red
Cell cycle - yeast	KEGG PATHWAY	ko04111	5	241	0.999844	0.999999	c177187_g1|c85324_g1|c125302_g1|c162401_g1|c212644_g1	http://www.genome.jp/kegg-bin/show_pathway?ko04111/K03094%09red/K04382%09red/K03456%09red/K02180%09red/K08866%09red
MicroRNAs in cancer	KEGG PATHWAY	ko05206	1	190	0.999999	0.999999	c100584_g1	http://www.genome.jp/kegg-bin/show_pathway?ko05206/K04368%09red
RNA degradation	KEGG PATHWAY	ko03018	7	381	0.999999	0.999999	c162946_g1|c186824_g1|c214617_g1|c111402_g1|c122242_g1|c28781_g1|c194773_g1	http://www.genome.jp/kegg-bin/show_pathway?ko03018/K04043%09red/K01689%09red/K12624%09red/K12622%09red/K12581%09red/K12626%09red/K04077%09red
Purine metabolism	KEGG PATHWAY	ko00230	21	708	0.999999	0.999999	c118169_g4|c222220_g1|c118169_g6|c119213_g4|c164447_g1|c161353_g1|c46972_g2|c213018_g1|c1519_g1|c60400_g1|c867_g1|c123681_g1|c162022_g1|c143370_g1|c140989_g1|c212986_g1|c162028_g1|c126472_g1|c45740_g1|c115645_g1|c51444_g1	http://www.genome.jp/kegg-bin/show_pathway?ko00230/K00856%09red/K00764%09red/K03014%09red/K03018%09red/K00088%09red/K01756%09red/K01951%09red/K03020%09red/K00958%09red/K00948%09red/K01939%09red/K00939%09red/K00942%09red/K00873%09red/K00940%09red/K11808%09red
--------------------
#Term	Database	ID	Input number	Background number	P-Value	Corrected P-Value	Input	Hyperlink
--------------------
#Term	Database	ID	Input number	Background number	P-Value	Corrected P-Value	Input	Hyperlink
--------------------

## Sheet: F6hvsM6h_down.DEG
Supplementary Table 4. Different expression genes enriched KEGG pathway
##Databases: KEGG PATHWAY
##Statistical test method: hypergeometric test / Fisher's exact test
##FDR correction method: Benjamini and Hochberg
#Term	Database	ID	Input number	Background number	P-Value	Corrected P-Value	Input	Hyperlink
Glutathione metabolism	KEGG PATHWAY	ko00480	4	181	3.84397e-05	0.00050797	c111009_g1|c119328_g1|c106063_g1|c102036_g1	http://www.genome.jp/kegg-bin/show_pathway?ko00480/K01581%09red/K00799%09red
Drug metabolism - cytochrome P450	KEGG PATHWAY	ko00982	3	79	8.29854e-05	0.00050797	c119328_g1|c106063_g1|c102036_g1	http://www.genome.jp/kegg-bin/show_pathway?ko00982/K00799%09red
Chemical carcinogenesis	KEGG PATHWAY	ko05204	3	79	8.29854e-05	0.00050797	c119328_g1|c106063_g1|c102036_g1	http://www.genome.jp/kegg-bin/show_pathway?ko05204/K00799%09red
Metabolism of xenobiotics by cytochrome P450	KEGG PATHWAY	ko00980	3	82	9.23582e-05	0.00050797	c119328_g1|c106063_g1|c102036_g1	http://www.genome.jp/kegg-bin/show_pathway?ko00980/K00799%09red
Starch and sucrose metabolism	KEGG PATHWAY	ko00500	3	365	0.00632093	0.0278121	c112249_g1|c119944_g2|c121034_g3	http://www.genome.jp/kegg-bin/show_pathway?ko00500/K16055%09red/K01177%09red
Novobiocin biosynthesis	KEGG PATHWAY	ko00401	1	10	0.0112443	0.041229	c114689_g1	http://www.genome.jp/kegg-bin/show_pathway?ko00401/K00815%09red
Phenylalanine metabolism	KEGG PATHWAY	ko00360	2	190	0.0166283	0.0522603	c103286_g1|c114689_g1	http://www.genome.jp/kegg-bin/show_pathway?ko00360/K00430%09red/K00815%09red
Thiamine metabolism	KEGG PATHWAY	ko00730	1	20	0.0213598	0.0587394	c112351_g1	http://www.genome.jp/kegg-bin/show_pathway?ko00730/K01662%09red
Sesquiterpenoid and triterpenoid biosynthesis	KEGG PATHWAY	ko00909	1	35	0.036345	0.0864934	c113752_g1	http://www.genome.jp/kegg-bin/show_pathway?ko00909/K15472%09red
Tropane, piperidine and pyridine alkaloid biosynthesis	KEGG PATHWAY	ko00960	1	38	0.0393152	0.0864934	c114689_g1	http://www.genome.jp/kegg-bin/show_pathway?ko00960/K00815%09red
Isoquinoline alkaloid biosynthesis	KEGG PATHWAY	ko00950	1	48	0.0491518	0.0983036	c114689_g1	http://www.genome.jp/kegg-bin/show_pathway?ko00950/K00815%09red
Ubiquinone and other terpenoid-quinone biosynthesis	KEGG PATHWAY	ko00130	1	60	0.0608268	0.10784	c114689_g1	http://www.genome.jp/kegg-bin/show_pathway?ko00130/K00815%09red
Nitrogen metabolism	KEGG PATHWAY	ko00910	1	63	0.0637237	0.10784	c119369_g1	http://www.genome.jp/kegg-bin/show_pathway?ko00910/K10534%09red
Phenylalanine, tyrosine and tryptophan biosynthesis	KEGG PATHWAY	ko00400	1	72	0.0723625	0.113713	c114689_g1	http://www.genome.jp/kegg-bin/show_pathway?ko00400/K00815%09red
Terpenoid backbone biosynthesis	KEGG PATHWAY	ko00900	1	87	0.086589	0.120354	c112351_g1	http://www.genome.jp/kegg-bin/show_pathway?ko00900/K01662%09red
Tyrosine metabolism	KEGG PATHWAY	ko00350	1	88	0.0875298	0.120354	c114689_g1	http://www.genome.jp/kegg-bin/show_pathway?ko00350/K00815%09red
Photosynthesis	KEGG PATHWAY	ko00195	1	117	0.114409	0.148059	c112990_g1	http://www.genome.jp/kegg-bin/show_pathway?ko00195/K02641%09red
Arginine and proline metabolism	KEGG PATHWAY	ko00330	1	173	0.164157	0.200636	c111009_g1	http://www.genome.jp/kegg-bin/show_pathway?ko00330/K01581%09red
Cysteine and methionine metabolism	KEGG PATHWAY	ko00270	1	211	0.196357	0.227361	c114689_g1	http://www.genome.jp/kegg-bin/show_pathway?ko00270/K00815%09red
Phenylpropanoid biosynthesis	KEGG PATHWAY	ko00940	1	282	0.253326	0.278658	c103286_g1	http://www.genome.jp/kegg-bin/show_pathway?ko00940/K00430%09red
Plant hormone signal transduction	KEGG PATHWAY	ko04075	1	349	0.303478	0.317929	c115971_g1	http://www.genome.jp/kegg-bin/show_pathway?ko04075/K14488%09red
Biosynthesis of amino acids	KEGG PATHWAY	ko01230	1	554	0.437455	0.437455	c114689_g1	http://www.genome.jp/kegg-bin/show_pathway?ko01230/K00815%09red
--------------------
#Term	Database	ID	Input number	Background number	P-Value	Corrected P-Value	Input	Hyperlink
--------------------
#Term	Database	ID	Input number	Background number	P-Value	Corrected P-Value	Input	Hyperlink
--------------------

## Sheet: F12hvsM12h_down.DEG
Supplementary Table 4. Different expression genes enriched KEGG pathway
##Databases: KEGG PATHWAY
##Statistical test method: hypergeometric test / Fisher's exact test
##FDR correction method: Benjamini and Hochberg
#Term	Database	ID	Input number	Background number	P-Value	Corrected P-Value	Input	Hyperlink
C5-Branched dibasic acid metabolism	KEGG PATHWAY	ko00660	2	22	0.000278745	0.00641113	c111522_g1|c111522_g2	http://www.genome.jp/kegg-bin/show_pathway?ko00660/K00052%09red
Valine, leucine and isoleucine biosynthesis	KEGG PATHWAY	ko00290	2	51	0.00136597	0.0157087	c111522_g1|c111522_g2	http://www.genome.jp/kegg-bin/show_pathway?ko00290/K00052%09red
Starch and sucrose metabolism	KEGG PATHWAY	ko00500	3	365	0.00632093	0.0454722	c121835_g2|c103121_g3|c119219_g1	http://www.genome.jp/kegg-bin/show_pathway?ko00500/K01051%09red/K05350%09red
2-Oxocarboxylic acid metabolism	KEGG PATHWAY	ko01210	2	140	0.00937316	0.0454722	c111522_g1|c111522_g2	http://www.genome.jp/kegg-bin/show_pathway?ko01210/K00052%09red
Pentose and glucuronate interconversions	KEGG PATHWAY	ko00040	2	144	0.00988527	0.0454722	c103121_g3|c119219_g1	http://www.genome.jp/kegg-bin/show_pathway?ko00040/K01051%09red
Neuroactive ligand-receptor interaction	KEGG PATHWAY	ko04080	1	15	0.0163147	0.0625395	c98774_g1	http://www.genome.jp/kegg-bin/show_pathway?ko04080/K05770%09red
Parkinson's disease	KEGG PATHWAY	ko05012	2	258	0.0292414	0.0960789	c179028_g1|c52742_g1	http://www.genome.jp/kegg-bin/show_pathway?ko05012/K02256%09red/K02126%09red
Alzheimer's disease	KEGG PATHWAY	ko05010	2	290	0.0361566	0.10395	c179028_g1|c52742_g1	http://www.genome.jp/kegg-bin/show_pathway?ko05010/K02256%09red/K02126%09red
Huntington's disease	KEGG PATHWAY	ko05016	2	347	0.0498497	0.11473	c179028_g1|c52742_g1	http://www.genome.jp/kegg-bin/show_pathway?ko05016/K02256%09red/K02126%09red
Diterpenoid biosynthesis	KEGG PATHWAY	ko00904	1	54	0.0550068	0.11473	c112577_g1	http://www.genome.jp/kegg-bin/show_pathway?ko00904/K04124%09red
Oxidative phosphorylation	KEGG PATHWAY	ko00190	2	380	0.0585073	0.11473	c179028_g1|c52742_g1	http://www.genome.jp/kegg-bin/show_pathway?ko00190/K02256%09red/K02126%09red
Cardiac muscle contraction	KEGG PATHWAY	ko04260	1	59	0.0598592	0.11473	c52742_g1	http://www.genome.jp/kegg-bin/show_pathway?ko04260/K02256%09red
Inositol phosphate metabolism	KEGG PATHWAY	ko00562	1	105	0.103381	0.162182	c120349_g1	http://www.genome.jp/kegg-bin/show_pathway?ko00562/K00921%09red
Biosynthesis of amino acids	KEGG PATHWAY	ko01230	2	554	0.111244	0.162182	c111522_g1|c111522_g2	http://www.genome.jp/kegg-bin/show_pathway?ko01230/K00052%09red
Cyanoamino acid metabolism	KEGG PATHWAY	ko00460	1	116	0.113495	0.162182	c121835_g2	http://www.genome.jp/kegg-bin/show_pathway?ko00460/K05350%09red
Regulation of actin cytoskeleton	KEGG PATHWAY	ko04810	1	119	0.116234	0.162182	c120349_g1	http://www.genome.jp/kegg-bin/show_pathway?ko04810/K00921%09red
Phosphatidylinositol signaling system	KEGG PATHWAY	ko04070	1	123	0.119874	0.162182	c120349_g1	http://www.genome.jp/kegg-bin/show_pathway?ko04070/K00921%09red
Phagosome	KEGG PATHWAY	ko04145	1	192	0.18041	0.230524	c120349_g1	http://www.genome.jp/kegg-bin/show_pathway?ko04145/K00921%09red
Cysteine and methionine metabolism	KEGG PATHWAY	ko00270	1	211	0.196357	0.237696	c120958_g3	http://www.genome.jp/kegg-bin/show_pathway?ko00270/K01251%09red
HTLV-I infection	KEGG PATHWAY	ko05166	1	238	0.218502	0.251277	c98774_g1	http://www.genome.jp/kegg-bin/show_pathway?ko05166/K05770%09red
Non-alcoholic fatty liver disease (NAFLD)	KEGG PATHWAY	ko04932	1	253	0.230547	0.252504	c52742_g1	http://www.genome.jp/kegg-bin/show_pathway?ko04932/K02256%09red
Phenylpropanoid biosynthesis	KEGG PATHWAY	ko00940	1	282	0.253326	0.264841	c121835_g2	http://www.genome.jp/kegg-bin/show_pathway?ko00940/K05350%09red
Plant hormone signal transduction	KEGG PATHWAY	ko04075	1	349	0.303478	0.303478	c120728_g1	http://www.genome.jp/kegg-bin/show_pathway?ko04075/K14504%09red
--------------------
#Term	Database	ID	Input number	Background number	P-Value	Corrected P-Value	Input	Hyperlink
--------------------
#Term	Database	ID	Input number	Background number	P-Value	Corrected P-Value	Input	Hyperlink
--------------------

## Sheet: F24hvsM24h_down.DEG
Supplementary Table 4. Different expression genes enriched KEGG pathway
##Databases: KEGG PATHWAY
##Statistical test method: hypergeometric test / Fisher's exact test
##FDR correction method: Benjamini and Hochberg
#Term	Database	ID	Input number	Background number	P-Value	Corrected P-Value	Input	Hyperlink
Photosynthesis - antenna proteins	KEGG PATHWAY	ko00196	7	41	1.49912e-07	1.94885e-05	c95756_g1|c115791_g1|c115791_g3|c115791_g2|c106292_g1|c105618_g1|c110978_g1	http://www.genome.jp/kegg-bin/show_pathway?ko00196/K08914%09red/K08908%09red/K08909%09red/K08907%09red/K08916%09red/K08913%09red/K08912%09red
Phenylalanine metabolism	KEGG PATHWAY	ko00360	11	190	1.20812e-06	6.50869e-05	c103771_g1|c115552_g2|c101935_g1|c80387_g1|c109629_g1|c101806_g1|c116520_g1|c96040_g1|c116501_g1|c120735_g1|c103286_g1	http://www.genome.jp/kegg-bin/show_pathway?ko00360/K00276%09red/K00430%09red/K10775%09red
Phenylpropanoid biosynthesis	KEGG PATHWAY	ko00940	13	282	1.50201e-06	6.50869e-05	c103771_g1|c115552_g2|c101935_g1|c117898_g1|c80387_g1|c118292_g2|c116520_g1|c101806_g1|c119633_g1|c96040_g1|c116501_g1|c120735_g1|c103286_g1	http://www.genome.jp/kegg-bin/show_pathway?ko00940/K00430%09red/K00083%09red/K10775%09red
Photosynthesis	KEGG PATHWAY	ko00195	8	117	1.12703e-05	0.000366286	c93871_g1|c112990_g1|c105624_g1|c112682_g1|c108816_g1|c103076_g1|c116431_g1|c88841_g1	http://www.genome.jp/kegg-bin/show_pathway?ko00195/K02717%09red/K02692%09red/K02689%09red/K02641%09red/K02638%09red/K02639%09red/K02721%09red/K08901%09red
Polycyclic aromatic hydrocarbon degradation	KEGG PATHWAY	ko00624	5	61	0.000237025	0.00551198	c118562_g1|c119878_g3|c112383_g1|c118562_g2|c119288_g1	http://www.genome.jp/kegg-bin/show_pathway?ko00624/K00517%09red
Bisphenol degradation	KEGG PATHWAY	ko00363	5	62	0.000254399	0.00551198	c118562_g1|c119878_g3|c112383_g1|c118562_g2|c119288_g1	http://www.genome.jp/kegg-bin/show_pathway?ko00363/K00517%09red
Aminobenzoate degradation	KEGG PATHWAY	ko00627	5	67	0.00035621	0.00661532	c118562_g1|c119878_g3|c112383_g1|c118562_g2|c119288_g1	http://www.genome.jp/kegg-bin/show_pathway?ko00627/K00517%09red
Limonene and pinene degradation	KEGG PATHWAY	ko00903	5	80	0.000764384	0.0116433	c118562_g1|c119878_g3|c112383_g1|c118562_g2|c119288_g1	http://www.genome.jp/kegg-bin/show_pathway?ko00903/K00517%09red
Stilbenoid, diarylheptanoid and gingerol biosynthesis	KEGG PATHWAY	ko00945	5	81	0.000806072	0.0116433	c118562_g1|c119878_g3|c112383_g1|c118562_g2|c119288_g1	http://www.genome.jp/kegg-bin/show_pathway?ko00945/K00517%09red
Brassinosteroid biosynthesis	KEGG PATHWAY	ko00905	3	25	0.00164313	0.0213607	c114896_g1|c111004_g1|c83692_g1	http://www.genome.jp/kegg-bin/show_pathway?ko00905/K12640%09red/K09587%09red
Systemic lupus erythematosus	KEGG PATHWAY	ko05322	5	113	0.00326051	0.0385333	c108397_g1|c104260_g2|c118451_g3|c105392_g2|c105392_g1	http://www.genome.jp/kegg-bin/show_pathway?ko05322/K11254%09red/K11251%09red/K11253%09red
Galactose metabolism	KEGG PATHWAY	ko00052	5	123	0.0046088	0.0423013	c119079_g2|c118020_g1|c114413_g3|c118096_g1|c116359_g1	http://www.genome.jp/kegg-bin/show_pathway?ko00052/K01835%09red/K01193%09red/K01190%09red/K01784%09red/K06617%09red
Starch and sucrose metabolism	KEGG PATHWAY	ko00500	9	365	0.00461388	0.0423013	c113968_g1|c108264_g1|c119079_g2|c74217_g1|c117598_g1|c116359_g1|c117572_g1|c115394_g1|c114915_g1	http://www.genome.jp/kegg-bin/show_pathway?ko00500/K01193%09red/K00975%09red/K01176%09red/K01835%09red/K00703%09red/K01051%09red/K00696%09red
Pathogenic Escherichia coli infection	KEGG PATHWAY	ko05130	4	76	0.00467019	0.0423013	c106291_g1|c93305_g1|c102886_g2|c111237_g1	http://www.genome.jp/kegg-bin/show_pathway?ko05130/K07374%09red/K07375%09red
Gap junction	KEGG PATHWAY	ko04540	4	77	0.00488092	0.0423013	c106291_g1|c93305_g1|c102886_g2|c111237_g1	http://www.genome.jp/kegg-bin/show_pathway?ko04540/K07374%09red/K07375%09red
Linoleic acid metabolism	KEGG PATHWAY	ko00591	3	39	0.0052814	0.0429114	c113817_g1|c121089_g2|c118931_g1	http://www.genome.jp/kegg-bin/show_pathway?ko00591/K15718%09red
Alcoholism	KEGG PATHWAY	ko05034	6	199	0.00794623	0.0607653	c104260_g2|c108397_g1|c118451_g3|c105392_g2|c105392_g1|c97387_g1	http://www.genome.jp/kegg-bin/show_pathway?ko05034/K11254%09red/K11253%09red/K11251%09red/K02183%09red
Steroid biosynthesis	KEGG PATHWAY	ko00100	3	71	0.0245259	0.177132	c118107_g1|c111044_g1|c30376_g1	http://www.genome.jp/kegg-bin/show_pathway?ko00100/K01824%09red/K14423%09red/K09828%09red
Porphyrin and chlorophyll metabolism	KEGG PATHWAY	ko00860	3	78	0.0309404	0.211697	c117825_g1|c117939_g1|c106178_g1	http://www.genome.jp/kegg-bin/show_pathway?ko00860/K13606%09red/K00218%09red/K04035%09red
Amino sugar and nucleotide sugar metabolism	KEGG PATHWAY	ko00520	5	219	0.0412896	0.268383	c108264_g1|c117572_g1|c116359_g1|c114413_g3|c115394_g1	http://www.genome.jp/kegg-bin/show_pathway?ko00520/K01835%09red/K01784%09red/K00975%09red
beta-Alanine metabolism	KEGG PATHWAY	ko00410	3	92	0.0461324	0.285581	c109629_g1|c113067_g2|c111259_g1	http://www.genome.jp/kegg-bin/show_pathway?ko00410/K00276%09red/K12259%09red/K00140%09red
Biosynthesis of ansamycins	KEGG PATHWAY	ko01051	1	6	0.0573293	0.338764	c108036_g1	http://www.genome.jp/kegg-bin/show_pathway?ko01051/K00615%09red
Calcium signaling pathway	KEGG PATHWAY	ko04020	3	103	0.0601964	0.340241	c97387_g1|c117775_g2|c113653_g1	http://www.genome.jp/kegg-bin/show_pathway?ko04020/K05857%09red/K06268%09red/K02183%09red
Isoquinoline alkaloid biosynthesis	KEGG PATHWAY	ko00950	2	48	0.0661622	0.358379	c117774_g2|c109629_g1	http://www.genome.jp/kegg-bin/show_pathway?ko00950/K00276%09red/K00422%09red
Phagosome	KEGG PATHWAY	ko04145	4	192	0.0838821	0.436187	c106291_g1|c93305_g1|c102886_g2|c111237_g1	http://www.genome.jp/kegg-bin/show_pathway?ko04145/K07374%09red/K07375%09red
Amyotrophic lateral sclerosis (ALS)	KEGG PATHWAY	ko05014	2	59	0.0931714	0.465857	c117775_g2|c98392_g1	http://www.genome.jp/kegg-bin/show_pathway?ko05014/K03781%09red/K06268%09red
Amphetamine addiction	KEGG PATHWAY	ko05031	2	65	0.109024	0.524931	c97387_g1|c117775_g2	http://www.genome.jp/kegg-bin/show_pathway?ko05031/K06268%09red/K02183%09red
Carbohydrate digestion and absorption	KEGG PATHWAY	ko04973	1	15	0.126252	0.565956	c117598_g1	http://www.genome.jp/kegg-bin/show_pathway?ko04973/K01176%09red
Neuroactive ligand-receptor interaction	KEGG PATHWAY	ko04080	1	15	0.126252	0.565956	c98774_g1	http://www.genome.jp/kegg-bin/show_pathway?ko04080/K05770%09red
Tryptophan metabolism	KEGG PATHWAY	ko00380	2	74	0.133983	0.580595	c107696_g1|c98392_g1	http://www.genome.jp/kegg-bin/show_pathway?ko00380/K00164%09red/K03781%09red
Thiamine metabolism	KEGG PATHWAY	ko00730	1	20	0.162348	0.67049	c116499_g1	http://www.genome.jp/kegg-bin/show_pathway?ko00730/K03146%09red
Tyrosine metabolism	KEGG PATHWAY	ko00350	2	88	0.174926	0.67049	c117774_g2|c109629_g1	http://www.genome.jp/kegg-bin/show_pathway?ko00350/K00276%09red/K00422%09red
Streptomycin biosynthesis	KEGG PATHWAY	ko00521	1	23	0.183288	0.67049	c116359_g1	http://www.genome.jp/kegg-bin/show_pathway?ko00521/K01835%09red
Glyoxylate and dicarboxylate metabolism	KEGG PATHWAY	ko00630	3	174	0.186857	0.67049	c109966_g1|c98392_g1|c103676_g1	http://www.genome.jp/kegg-bin/show_pathway?ko00630/K03781%09red/K01602%09red/K01638%09red
Long-term potentiation	KEGG PATHWAY	ko04720	2	97	0.202174	0.67049	c97387_g1|c117775_g2	http://www.genome.jp/kegg-bin/show_pathway?ko04720/K06268%09red/K02183%09red
Cell cycle - Caulobacter	KEGG PATHWAY	ko04112	1	28	0.217036	0.67049	c93982_g1	http://www.genome.jp/kegg-bin/show_pathway?ko04112/K01358%09red
Mineral absorption	KEGG PATHWAY	ko04978	1	29	0.223617	0.67049	c94610_g2	http://www.genome.jp/kegg-bin/show_pathway?ko04978/K00522%09red
Zeatin biosynthesis	KEGG PATHWAY	ko00908	1	29	0.223617	0.67049	c116187_g1	http://www.genome.jp/kegg-bin/show_pathway?ko00908/K00279%09red
Inositol phosphate metabolism	KEGG PATHWAY	ko00562	2	105	0.226769	0.67049	c113653_g1|c113067_g2	http://www.genome.jp/kegg-bin/show_pathway?ko00562/K05857%09red/K00140%09red
Nicotinate and nicotinamide metabolism	KEGG PATHWAY	ko00760	1	30	0.230142	0.67049	c115618_g1	http://www.genome.jp/kegg-bin/show_pathway?ko00760/K18551%09red
Alzheimer's disease	KEGG PATHWAY	ko05010	4	290	0.23482	0.67049	c97387_g1|c117775_g2|c119841_g3|c72672_g2	http://www.genome.jp/kegg-bin/show_pathway?ko05010/K02256%09red/K03935%09red/K06268%09red/K02183%09red
Other glycan degradation	KEGG PATHWAY	ko00511	1	33	0.249394	0.67049	c118020_g1	http://www.genome.jp/kegg-bin/show_pathway?ko00511/K01190%09red
Phototransduction	KEGG PATHWAY	ko04744	1	33	0.249394	0.67049	c97387_g1	http://www.genome.jp/kegg-bin/show_pathway?ko04744/K02183%09red
Pentose phosphate pathway	KEGG PATHWAY	ko00030	2	113	0.25156	0.67049	c108036_g1|c116359_g1	http://www.genome.jp/kegg-bin/show_pathway?ko00030/K01835%09red/K00615%09red
Carbon fixation in photosynthetic organisms	KEGG PATHWAY	ko00710	3	205	0.254658	0.67049	c108036_g1|c109966_g1|c110206_g1	http://www.genome.jp/kegg-bin/show_pathway?ko00710/K01602%09red/K01610%09red/K00615%09red
Salivary secretion	KEGG PATHWAY	ko04970	1	34	0.255704	0.67049	c97387_g1	http://www.genome.jp/kegg-bin/show_pathway?ko04970/K02183%09red
Valine, leucine and isoleucine degradation	KEGG PATHWAY	ko00280	2	116	0.260881	0.67049	c114006_g1|c113067_g2	http://www.genome.jp/kegg-bin/show_pathway?ko00280/K00166%09red/K00140%09red
Sesquiterpenoid and triterpenoid biosynthesis	KEGG PATHWAY	ko00909	1	35	0.261961	0.67049	c120493_g1	http://www.genome.jp/kegg-bin/show_pathway?ko00909/K15472%09red
Olfactory transduction	KEGG PATHWAY	ko04740	1	36	0.268165	0.67049	c97387_g1	http://www.genome.jp/kegg-bin/show_pathway?ko04740/K02183%09red
Phototransduction - fly	KEGG PATHWAY	ko04745	1	36	0.268165	0.67049	c97387_g1	http://www.genome.jp/kegg-bin/show_pathway?ko04745/K02183%09red
Gastric acid secretion	KEGG PATHWAY	ko04971	1	36	0.268165	0.67049	c97387_g1	http://www.genome.jp/kegg-bin/show_pathway?ko04971/K02183%09red
Cysteine and methionine metabolism	KEGG PATHWAY	ko00270	3	211	0.268196	0.67049	c121057_g1|c118200_g3|c109908_g1	http://www.genome.jp/kegg-bin/show_pathway?ko00270/K01611%09red/K00558%09red
Tropane, piperidine and pyridine alkaloid biosynthesis	KEGG PATHWAY	ko00960	1	38	0.280419	0.680407	c109629_g1	http://www.genome.jp/kegg-bin/show_pathway?ko00960/K00276%09red
Phosphatidylinositol signaling system	KEGG PATHWAY	ko04070	2	123	0.282631	0.680407	c97387_g1|c113653_g1	http://www.genome.jp/kegg-bin/show_pathway?ko04070/K05857%09red/K02183%09red
cGMP-PKG signaling pathway	KEGG PATHWAY	ko04022	2	125	0.288838	0.682707	c97387_g1|c117775_g2	http://www.genome.jp/kegg-bin/show_pathway?ko04022/K06268%09red/K02183%09red
T cell receptor signaling pathway	KEGG PATHWAY	ko04660	1	44	0.315967	0.722778	c117775_g2	http://www.genome.jp/kegg-bin/show_pathway?ko04660/K06268%09red
MAPK signaling pathway	KEGG PATHWAY	ko04010	2	139	0.332031	0.722778	c117775_g2|c33280_g1	http://www.genome.jp/kegg-bin/show_pathway?ko04010/K06268%09red/K03283%09red
Natural killer cell mediated cytotoxicity	KEGG PATHWAY	ko04650	1	48	0.338688	0.722778	c117775_g2	http://www.genome.jp/kegg-bin/show_pathway?ko04650/K06268%09red
Sphingolipid metabolism	KEGG PATHWAY	ko00600	1	49	0.34425	0.722778	c118020_g1	http://www.genome.jp/kegg-bin/show_pathway?ko00600/K01190%09red
Circadian entrainment	KEGG PATHWAY	ko04713	1	49	0.34425	0.722778	c97387_g1	http://www.genome.jp/kegg-bin/show_pathway?ko04713/K02183%09red
VEGF signaling pathway	KEGG PATHWAY	ko04370	1	49	0.34425	0.722778	c117775_g2	http://www.genome.jp/kegg-bin/show_pathway?ko04370/K06268%09red
Plant hormone signal transduction	KEGG PATHWAY	ko04075	4	349	0.344709	0.722778	c116572_g1|c91695_g1|c108587_g2|c108140_g1	http://www.genome.jp/kegg-bin/show_pathway?ko04075/K14495%09red/K14505%09red/K14497%09red/K14431%09red
Inflammatory mediator regulation of TRP channels	KEGG PATHWAY	ko04750	1	54	0.371367	0.75331	c97387_g1	http://www.genome.jp/kegg-bin/show_pathway?ko04750/K02183%09red
Parkinson's disease	KEGG PATHWAY	ko05012	3	258	0.375504	0.75331	c115621_g1|c119841_g3|c72672_g2	http://www.genome.jp/kegg-bin/show_pathway?ko05012/K02256%09red/K03935%09red/K03883%09red
Osteoclast differentiation	KEGG PATHWAY	ko04380	1	55	0.376655	0.75331	c117775_g2	http://www.genome.jp/kegg-bin/show_pathway?ko04380/K06268%09red
Cardiac muscle contraction	KEGG PATHWAY	ko04260	1	59	0.397367	0.760173	c72672_g2	http://www.genome.jp/kegg-bin/show_pathway?ko04260/K02256%09red
B cell receptor signaling pathway	KEGG PATHWAY	ko04662	1	60	0.402437	0.760173	c117775_g2	http://www.genome.jp/kegg-bin/show_pathway?ko04662/K06268%09red
Pantothenate and CoA biosynthesis	KEGG PATHWAY	ko00770	1	60	0.402437	0.760173	c112053_g1	http://www.genome.jp/kegg-bin/show_pathway?ko00770/K00606%09red
Oxidative phosphorylation	KEGG PATHWAY	ko00190	4	380	0.403476	0.760173	c121506_g1|c115621_g1|c119841_g3|c72672_g2	http://www.genome.jp/kegg-bin/show_pathway?ko00190/K02256%09red/K03935%09red/K01507%09red/K03883%09red
Estrogen signaling pathway	KEGG PATHWAY	ko04915	2	166	0.412849	0.764241	c97387_g1|c33280_g1	http://www.genome.jp/kegg-bin/show_pathway?ko04915/K03283%09red/K02183%09red
Nitrogen metabolism	KEGG PATHWAY	ko00910	1	63	0.417393	0.764241	c119369_g1	http://www.genome.jp/kegg-bin/show_pathway?ko00910/K10534%09red
Axon guidance	KEGG PATHWAY	ko04360	1	65	0.427156	0.77116	c117775_g2	http://www.genome.jp/kegg-bin/show_pathway?ko04360/K06268%09red
Arginine and proline metabolism	KEGG PATHWAY	ko00330	2	173	0.433036	0.77116	c109908_g1|c111259_g1	http://www.genome.jp/kegg-bin/show_pathway?ko00330/K01611%09red/K12259%09red
Vascular smooth muscle contraction	KEGG PATHWAY	ko04270	1	69	0.446196	0.773406	c97387_g1	http://www.genome.jp/kegg-bin/show_pathway?ko04270/K02183%09red
Lysine degradation	KEGG PATHWAY	ko00310	1	69	0.446196	0.773406	c107696_g1	http://www.genome.jp/kegg-bin/show_pathway?ko00310/K00164%09red
Glutamatergic synapse	KEGG PATHWAY	ko04724	1	72	0.46006	0.774173	c117775_g2	http://www.genome.jp/kegg-bin/show_pathway?ko04724/K06268%09red
Citrate cycle (TCA cycle)	KEGG PATHWAY	ko00020	2	184	0.463991	0.774173	c107696_g1|c110206_g1	http://www.genome.jp/kegg-bin/show_pathway?ko00020/K00164%09red/K01610%09red
Rap1 signaling pathway	KEGG PATHWAY	ko04015	1	74	0.469111	0.774173	c97387_g1	http://www.genome.jp/kegg-bin/show_pathway?ko04015/K02183%09red
Carbon metabolism	KEGG PATHWAY	ko01200	6	648	0.470919	0.774173	c107696_g1|c103676_g1|c110206_g1|c108036_g1|c109966_g1|c113067_g2	http://www.genome.jp/kegg-bin/show_pathway?ko01200/K00140%09red/K00164%09red/K01638%09red/K01602%09red/K01610%09red/K00615%09red
MicroRNAs in cancer	KEGG PATHWAY	ko05206	2	190	0.480453	0.774173	c121057_g1|c118200_g3	http://www.genome.jp/kegg-bin/show_pathway?ko05206/K00558%09red
Chemical carcinogenesis	KEGG PATHWAY	ko05204	1	79	0.491081	0.774173	c107254_g1	http://www.genome.jp/kegg-bin/show_pathway?ko05204/K00799%09red
Drug metabolism - cytochrome P450	KEGG PATHWAY	ko00982	1	79	0.491081	0.774173	c107254_g1	http://www.genome.jp/kegg-bin/show_pathway?ko00982/K00799%09red
Melanogenesis	KEGG PATHWAY	ko04916	1	80	0.495365	0.774173	c97387_g1	http://www.genome.jp/kegg-bin/show_pathway?ko04916/K02183%09red
Metabolism of xenobiotics by cytochrome P450	KEGG PATHWAY	ko00980	1	82	0.503826	0.774173	c107254_g1	http://www.genome.jp/kegg-bin/show_pathway?ko00980/K00799%09red
GnRH signaling pathway	KEGG PATHWAY	ko04912	1	84	0.512145	0.774173	c97387_g1	http://www.genome.jp/kegg-bin/show_pathway?ko04912/K02183%09red
Glioma	KEGG PATHWAY	ko05214	1	84	0.512145	0.774173	c97387_g1	http://www.genome.jp/kegg-bin/show_pathway?ko05214/K02183%09red
alpha-Linolenic acid metabolism	KEGG PATHWAY	ko00592	1	86	0.520325	0.77444	c107152_g1	http://www.genome.jp/kegg-bin/show_pathway?ko00592/K01723%09red
Base excision repair	KEGG PATHWAY	ko03410	1	88	0.528369	0.77444	c97890_g1	http://www.genome.jp/kegg-bin/show_pathway?ko03410/K10802%09red
Propanoate metabolism	KEGG PATHWAY	ko00640	1	90	0.536278	0.77444	c113067_g2	http://www.genome.jp/kegg-bin/show_pathway?ko00640/K00140%09red
Transcriptional misregulation in cancer	KEGG PATHWAY	ko05202	1	91	0.540183	0.77444	c108397_g1	http://www.genome.jp/kegg-bin/show_pathway?ko05202/K11253%09red
Pyruvate metabolism	KEGG PATHWAY	ko00620	2	216	0.548065	0.77444	c103676_g1|c110206_g1	http://www.genome.jp/kegg-bin/show_pathway?ko00620/K01610%09red/K01638%09red
Oxytocin signaling pathway	KEGG PATHWAY	ko04921	2	216	0.548065	0.77444	c97387_g1|c117775_g2	http://www.genome.jp/kegg-bin/show_pathway?ko04921/K06268%09red/K02183%09red
Apoptosis	KEGG PATHWAY	ko04210	1	102	0.581034	0.812198	c117775_g2	http://www.genome.jp/kegg-bin/show_pathway?ko04210/K06268%09red
HTLV-I infection	KEGG PATHWAY	ko05166	2	238	0.600298	0.824307	c117775_g2|c98774_g1	http://www.genome.jp/kegg-bin/show_pathway?ko05166/K06268%09red/K05770%09red
Adrenergic signaling in cardiomyocytes	KEGG PATHWAY	ko04261	1	114	0.621484	0.824307	c97387_g1	http://www.genome.jp/kegg-bin/show_pathway?ko04261/K02183%09red
Tuberculosis	KEGG PATHWAY	ko05152	2	249	0.624664	0.824307	c97387_g1|c117775_g2	http://www.genome.jp/kegg-bin/show_pathway?ko05152/K06268%09red/K02183%09red
Ras signaling pathway	KEGG PATHWAY	ko04014	1	115	0.624673	0.824307	c97387_g1	http://www.genome.jp/kegg-bin/show_pathway?ko04014/K02183%09red
Non-alcoholic fatty liver disease (NAFLD)	KEGG PATHWAY	ko04932	2	253	0.633236	0.824307	c119841_g3|c72672_g2	http://www.genome.jp/kegg-bin/show_pathway?ko04932/K02256%09red/K03935%09red
Thyroid hormone signaling pathway	KEGG PATHWAY	ko04919	1	118	0.634083	0.824307	c113653_g1	http://www.genome.jp/kegg-bin/show_pathway?ko04919/K05857%09red
Dopaminergic synapse	KEGG PATHWAY	ko04728	1	118	0.634083	0.824307	c97387_g1	http://www.genome.jp/kegg-bin/show_pathway?ko04728/K02183%09red
Oocyte meiosis	KEGG PATHWAY	ko04114	2	265	0.658035	0.846976	c97387_g1|c117775_g2	http://www.genome.jp/kegg-bin/show_pathway?ko04114/K06268%09red/K02183%09red
Pertussis	KEGG PATHWAY	ko05133	1	133	0.677718	0.863758	c97387_g1	http://www.genome.jp/kegg-bin/show_pathway?ko05133/K02183%09red
Pentose and glucuronate interconversions	KEGG PATHWAY	ko00040	1	144	0.706385	0.877714	c74217_g1	http://www.genome.jp/kegg-bin/show_pathway?ko00040/K01051%09red
Glycine, serine and threonine metabolism	KEGG PATHWAY	ko00260	1	145	0.708861	0.877714	c109629_g1	http://www.genome.jp/kegg-bin/show_pathway?ko00260/K00276%09red
Glycolysis / Gluconeogenesis	KEGG PATHWAY	ko00010	2	292	0.708922	0.877714	c110206_g1|c116359_g1	http://www.genome.jp/kegg-bin/show_pathway?ko00010/K01835%09red/K01610%09red
cAMP signaling pathway	KEGG PATHWAY	ko04024	1	148	0.716166	0.878317	c97387_g1	http://www.genome.jp/kegg-bin/show_pathway?ko04024/K02183%09red
Wnt signaling pathway	KEGG PATHWAY	ko04310	1	158	0.739224	0.898122	c117775_g2	http://www.genome.jp/kegg-bin/show_pathway?ko04310/K06268%09red
Glutathione metabolism	KEGG PATHWAY	ko00480	1	181	0.785416	0.928895	c107254_g1	http://www.genome.jp/kegg-bin/show_pathway?ko00480/K00799%09red
Legionellosis	KEGG PATHWAY	ko05134	1	183	0.789025	0.928895	c33280_g1	http://www.genome.jp/kegg-bin/show_pathway?ko05134/K03283%09red
Peroxisome	KEGG PATHWAY	ko04146	1	185	0.792573	0.928895	c98392_g1	http://www.genome.jp/kegg-bin/show_pathway?ko04146/K03781%09red
Huntington's disease	KEGG PATHWAY	ko05016	2	347	0.793134	0.928895	c119841_g3|c72672_g2	http://www.genome.jp/kegg-bin/show_pathway?ko05016/K02256%09red/K03935%09red
Antigen processing and presentation	KEGG PATHWAY	ko04612	1	196	0.811051	0.934904	c33280_g1	http://www.genome.jp/kegg-bin/show_pathway?ko04612/K03283%09red
Neurotrophin signaling pathway	KEGG PATHWAY	ko04722	1	197	0.812647	0.934904	c97387_g1	http://www.genome.jp/kegg-bin/show_pathway?ko04722/K02183%09red
RNA transport	KEGG PATHWAY	ko03013	2	376	0.828278	0.939148	c109739_g1|c65849_g1	http://www.genome.jp/kegg-bin/show_pathway?ko03013/K13171%09red/K03113%09red
FoxO signaling pathway	KEGG PATHWAY	ko04068	1	209	0.830785	0.939148	c98392_g1	http://www.genome.jp/kegg-bin/show_pathway?ko04068/K03781%09red
Measles	KEGG PATHWAY	ko05162	1	220	0.84587	0.941303	c33280_g1	http://www.genome.jp/kegg-bin/show_pathway?ko05162/K03283%09red
Toxoplasmosis	KEGG PATHWAY	ko05145	1	221	0.847173	0.941303	c33280_g1	http://www.genome.jp/kegg-bin/show_pathway?ko05145/K03283%09red
Influenza A	KEGG PATHWAY	ko05164	1	235	0.864303	0.952198	c33280_g1	http://www.genome.jp/kegg-bin/show_pathway?ko05164/K03283%09red
mRNA surveillance pathway	KEGG PATHWAY	ko03015	1	264	0.89394	0.971328	c109739_g1	http://www.genome.jp/kegg-bin/show_pathway?ko03015/K13171%09red
Ubiquitin mediated proteolysis	KEGG PATHWAY	ko04120	1	267	0.896611	0.971328	c113218_g1	http://www.genome.jp/kegg-bin/show_pathway?ko04120/K10581%09red
Viral carcinogenesis	KEGG PATHWAY	ko05203	1	297	0.919896	0.972661	c118451_g3	http://www.genome.jp/kegg-bin/show_pathway?ko05203/K11254%09red
Protein processing in endoplasmic reticulum	KEGG PATHWAY	ko04141	2	502	0.926373	0.972661	c98432_g1|c33280_g1	http://www.genome.jp/kegg-bin/show_pathway?ko04141/K13993%09red/K03283%09red
Insulin signaling pathway	KEGG PATHWAY	ko04910	1	310	0.928286	0.972661	c97387_g1	http://www.genome.jp/kegg-bin/show_pathway?ko04910/K02183%09red
Plant-pathogen interaction	KEGG PATHWAY	ko04626	1	322	0.935251	0.972661	c97387_g1	http://www.genome.jp/kegg-bin/show_pathway?ko04626/K02183%09red
Endocytosis	KEGG PATHWAY	ko04144	1	322	0.935251	0.972661	c33280_g1	http://www.genome.jp/kegg-bin/show_pathway?ko04144/K03283%09red
Epstein-Barr virus infection	KEGG PATHWAY	ko05169	1	407	0.968634	0.998558	c33280_g1	http://www.genome.jp/kegg-bin/show_pathway?ko05169/K03283%09red
Spliceosome	KEGG PATHWAY	ko03040	1	446	0.977522	0.998558	c33280_g1	http://www.genome.jp/kegg-bin/show_pathway?ko03040/K03283%09red
Purine metabolism	KEGG PATHWAY	ko00230	2	708	0.983196	0.998558	c117586_g1|c116359_g1	http://www.genome.jp/kegg-bin/show_pathway?ko00230/K01835%09red/K02083%09red
Biosynthesis of amino acids	KEGG PATHWAY	ko01230	1	554	0.991084	0.998767	c108036_g1	http://www.genome.jp/kegg-bin/show_pathway?ko01230/K00615%09red
Ribosome	KEGG PATHWAY	ko03010	1	795	0.99888	0.99888	c107190_g1	http://www.genome.jp/kegg-bin/show_pathway?ko03010/K02951%09red
--------------------
#Term	Database	ID	Input number	Background number	P-Value	Corrected P-Value	Input	Hyperlink
--------------------
#Term	Database	ID	Input number	Background number	P-Value	Corrected P-Value	Input	Hyperlink
--------------------
